1 **Full title:** *Pseudomonas aeruginosa* type IV minor pilins and PilY1 regulate virulence by  
2 modulating FimS-AlgR activity

3 **Short title:** Minor pilins regulate virulence by modulating FimS-AlgR activity

4 **Authors:** Victoria A. Marko, Sara L.N. Kilmury, Lesley T. MacNeil, and Lori L. Burrows\*.

5 **Affiliations:** Department of Biochemistry and Biomedical Sciences and the Michael G.  
6 DeGroote Institute for Infectious Diseases Research, McMaster University, Hamilton, ON,  
7 Canada.

8 \*For correspondence: burrowl@mcmaster.ca

9

## 10 **Abstract**

11 Type IV pili are expressed by a wide range of prokaryotes, including the opportunistic  
12 pathogen *Pseudomonas aeruginosa*. These flexible fibres mediate twitching motility, biofilm  
13 maturation, surface adhesion, and virulence. The pilus is composed mainly of major pilin  
14 subunits while the low abundance minor pilins FimU-PilVWXE and the putative adhesin PilY1  
15 prime pilus assembly and are proposed to form the pilus tip. The minor pilins and PilY1 are  
16 encoded in an operon that is positively regulated by the FimS-AlgR two-component system.  
17 Independent of pilus assembly, PilY1 is proposed to be a mechanosensory component that - in  
18 conjunction with minor pilins - triggers up-regulation of acute virulence phenotypes upon surface  
19 attachment. Here, we investigated the link between the minor pilins and virulence. *pilW*, *pilX*,  
20 and *pilY1* mutants had reduced virulence towards *Caenorhabditis elegans* relative to wild type or  
21 a major pilin mutant, implying a role in pathogenicity that is independent of pilus assembly. We  
22 hypothesized that loss of specific minor pilins relieves feedback inhibition on FimS-AlgR,  
23 increasing transcription of the minor pilin operon and other members of the AlgR regulon.

24 Reporter assays confirmed that FimS-AlgR were required for the increased expression from the  
25 minor pilin operon promoter upon loss of select minor pilins. Overexpression of AlgR or its  
26 hyperactivation via point mutation reduced virulence, and the virulence defects of *pilW*, *pilX*, and  
27 *pilY1* mutants were dependent on FimS-AlgR expression and activation. We propose that PilY1  
28 and the minor pilins inhibit their own expression, and that loss of these proteins leads to FimS-  
29 mediated activation of AlgR and reduced expression of acute-phase virulence factors. This  
30 mechanism could contribute to adaptation of *P. aeruginosa* in chronic lung infections, as  
31 mutations in the minor pilin operon result in the loss of piliation and increased expression of  
32 AlgR-dependent virulence factors – such as alginate – that are characteristic of such infections.

33

#### 34 **Author summary**

35 *Pseudomonas aeruginosa* causes dangerous infections, including chronic lung infections  
36 in cystic fibrosis patients. It uses many strategies to infect its hosts, including deployment of  
37 grappling hook-like fibres called type IV pili. Among the components involved in assembly and  
38 function of the pilus are five proteins called minor pilins that - along with a larger protein called  
39 PilY1 - may help the pilus attach to surfaces. In a roundworm infection model, loss of PilY1 and  
40 specific minor pilins delayed killing, while loss of other pilus proteins did not. We traced this  
41 effect to increased activation of the FimS-AlgR regulatory system that inhibits expression of  
42 virulence factors used to initiate infections, while positively regulating chronic infection traits  
43 such as alginate production, a phenotype called mucoidy. A disruption in the appropriate timing  
44 of FimS-AlgR-dependent virulence factor expression when select minor pilins or PilY1 are  
45 missing may explain why those pilus-deficient mutants have reduced virulence compared with  
46 others whose products are not under FimS-AlgR control. Increased FimS-AlgR activity upon

47 loss of PilY1 and specific minor pilins could help to explain the frequent co-occurrence of the  
48 non-piliated and mucoid phenotypes that are hallmarks of chronic *P. aeruginosa* lung infections.

49

## 50 **Introduction**

51 *Pseudomonas aeruginosa* is a Gram-negative opportunistic pathogen, recently listed as  
52 one of the highest priority antimicrobial-resistant threats by the World Health Organization, due  
53 to its intrinsic antibiotic resistance and recalcitrance to therapy [1]. Among its virulence factors  
54 are filamentous surface appendages called type IV pili (T4P), sophisticated biological  
55 nanomachines that are broadly distributed among bacteria and archaea [2, 3]. In *P. aeruginosa*,  
56 T4P facilitate surface and host cell adhesion, colonization, biofilm maturation, virulence, and  
57 twitching, a form of surface-associated motility facilitated by cycles of extension, adhesion, and  
58 retraction of T4P fibres [3-11]. T4P are composed of hundreds to thousands of copies of small  
59 proteins called major pilins (PilA in *P. aeruginosa*) along with the low abundance minor pilins  
60 (MPs) FimU-PilVWXE [12-16]. The MPs are encoded in a polycistronic operon with the *pilY1*  
61 gene that codes for a large ~125 kDa non-pilin protein. The operon is positively regulated by the  
62 virulence factor regulator Vfr, and the two-component system (TCS) FimS (AlgZ)-AlgR. FimS is  
63 a predicted histidine sensor kinase and AlgR is a response regulator that promotes expression of  
64 genes important for biofilms and chronic cystic fibrosis (CF) lung infections [17-21]. The N-  
65 termini of immature pilins are cleaved and methylated at the cytoplasmic face of the inner  
66 membrane (IM) by the prepilin peptidase, PilD, while PilY1 may be processed by signal  
67 peptidase 1 [22-25]. Mature pilins are polymerized into a T4P fibre via an envelope-spanning  
68 assembly machinery, where individual PilA subunits are added or removed at the platform  
69 protein, PilC, via action of the ATPases PilB and PilT, respectively [2, 26].

70           The MPs and PilY1 are required for T4P function in several bacterial species, including  
71 *P. aeruginosa*, *Escherichia coli*, *Neisseria meningitidis*, *N. gonorrhoeae*, and *Myxococcus*  
72 *xanthus* [12-15, 27-30]. PilY1 and the MPs were originally proposed to oppose pilus retraction,  
73 as some surface pili remain in *pilY1* and MP mutants when retraction is blocked via deletion of  
74 *pilT* [23, 28, 29, 31, 32]. We recently showed that deletion of the minor pseudopilins of the Xcp  
75 type II secretion system in a *pilT* background lacking the T4P MPs abolished pilus assembly,  
76 suggesting that when MPs are missing, the minor pseudopilins can prime extension, but cannot  
77 counteract retraction [24]. We also demonstrated that PilY1 and the MPs are present in sheared  
78 pili, and that the loss of PilV, PilW, PilX, or PilY1 excludes the other three components from the  
79 pilus [24]. Thus, PilVWXY1 are proposed to form a core assembly-initiation subcomplex, while  
80 FimU and PilE are thought to connect this complex to PilA. Initiation of assembly with  
81 subsequent addition of multiple PilA subunits would place the MPs at the pilus tip, with PilY1 –  
82 the largest component – at the distal position, supporting the hypothesis that PilY1 is a T4P-  
83 associated adhesin [31].

84           PilY1 and the MPs (and their regulators FimS-AlgR) are required for T4P biogenesis, and  
85 therefore T4P-mediated function [12-15, 17, 19]. However, recent studies hinted at more  
86 enigmatic roles of PilWXY1 in virulence. Bohn et al. [33] showed that in a non-piliated *P.*  
87 *aeruginosa* background, subsequent loss of *pilY1* reduced virulence in a *Caenorhabditis elegans*  
88 fast killing assay and in a mouse airway infection model, and increased resistance to killing by  
89 neutrophils. Thus, PilY1 has a role in virulence that does not require functional pili. Other  
90 studies using *C. elegans* infection models suggested that MP and *pilY1* mutants had attenuated  
91 virulence relative to WT, and in one case, to a non-piliated mutant [34-37]. Recently, Siryaporn  
92 et al. [38] showed that PilWXY1 were required for surface-activated virulence towards amoebae,

93 while other non-piliated mutants had WT virulence. The N-terminal region of PilY1 has limited  
94 sequence similarity to the eukaryotic von Willebrand factor A (VWFa) domain, which can be  
95 deformed by shear forces [39]. In-frame deletion of this domain from PilY1 allowed normally  
96 avirulent planktonic cells to kill amoebae [38]. PilY1 was therefore proposed to be a  
97 mechanosensor, where deformation of its VWFa domain upon surface interaction led – by an as-  
98 yet unknown mechanism – to increased expression of virulence factors. One important caveat of  
99 that study was that an *algR* mutant (which also lacks PilY1 and the MPs) had WT virulence  
100 towards amoebae [38].

101 Deformation of PilA subunits by tensile forces acting upon surface-attached pili was also  
102 proposed as a possible way to signal attachment. Detection of partly unfolded pilins by the Pil-  
103 Chp chemotaxis system could lead to increased cyclic adenosine monophosphate (cAMP)  
104 synthesis via the CyaB adenylate cyclase [40, 41]. cAMP is bound by Vfr, a key transcription  
105 factor that promotes expression of virulence factors involved in motility, attachment, and  
106 secretion [20, 40, 41]. *fimS-algR* transcription is activated by Vfr, leading to increased  
107 transcription of *fimU-pilVWXYZIE* [40]. PilVWXYZ1 were proposed to repress their own  
108 expression in an AlgR-dependent manner, as the loss of *pilV*, *pilW*, *pilX*, or *pilY1* led to elevated  
109 expression of the MP operon and *fimS-algR* [23, 33, 38, 40]. The mechanism of this putative  
110 feedback inhibition is largely uncharacterized, but was speculated to involve FimS [40].

111 Once expression of the MP operon is activated, extracellular PilY1 may sense surface  
112 association via its VWFa domain and transduce this information through the T4P assembly  
113 machinery [38, 40]. This signal is thought to activate an IM-localized diguanylate cyclase, SadC,  
114 to increase levels of c-di-GMP, promoting expression of genes associated with a biofilm  
115 lifestyle, while repressing early-phase virulence traits such as swarming motility [40, 42]. This

116 model was supported by studies demonstrating that loss of *pilW*, *pilX*, or *pilY1* in a high-c-di-  
117 GMP background resulted in hyper-swarming and reduced c-di-GMP levels, as measured by  
118 liquid chromatography-mass spectrometry of extracts from surface-grown cells [39, 43].  
119 Rodesney et al. [44] showed that c-di-GMP levels increased in response to shear forces, and that  
120 functional T4P were required for this phenomenon, further supporting this hypothesis. However,  
121 unlike *pilW*, *pilX*, and *pilY1* mutants, a *sadC* mutant had WT virulence towards amoebae,  
122 suggesting the PilWXY1-SadC pathway may be important for surface sensing, but not  
123 necessarily for surface-activated virulence [38].

124 Although PilY1 and the MPs clearly influence virulence, the underlying mechanism  
125 remains to be established [33-36, 38, 45]. We hypothesized that a subset of these components  
126 represses FimS activity, such that loss of *pilW*, *pilX*, or *pilY1* activates FimS-AlgR, shifting the  
127 bacteria to a less pathogenic phenotype typically associated with chronic infection. We found  
128 that *pilW*, *pilX*, and *pilY1* mutants had attenuated virulence in *C. elegans* slow killing (SK)  
129 assays compared to WT or a *pilA* mutant, and this was dependent on FimS-AlgR, because double  
130 mutants had WT virulence. Hyperactivation (via phospho-mimetic point mutation) or  
131 overexpression of AlgR alone was sufficient to attenuate virulence. Together, these data are  
132 consistent with a model where loss of PilWXY1 relieves feedback inhibition on expression of the  
133 AlgR regulon, resulting in dysregulation of virulence factors that are important for *C. elegans*  
134 pathogenesis.

135

## 136 **Results**

### 137 **PilWXY1 are important for T4P-independent virulence in PA14 and PAO1**

138 Specific genes in the MP operon were reported to be important for virulence in amoebae,  
139 nematodes, and mouse models, but those studies were done using different strains of *P.*  
140 *aeruginosa* [33-36, 38, 45]. We first sought to confirm these results in the *C. elegans* SK model,  
141 using two well-studied strains. SK assays were performed using PA14 with deletions of *pilA*,  
142 *fimU*, *pilV*, *pilW*, *pilX*, *pilY1*, or *pilE* (Fig 1A). An *E. coli* OP50 plate was included as a negative  
143 control for pathogenicity; worms began to senesce on these plates around day 7-8, consistent  
144 with published data regarding temperature-dependent effects on lifespan [46]. Given that worms  
145 at later time points were at increased risk of death due to ageing in addition to *P. aeruginosa*  
146 infection, statistical significance was assessed using the Gehan-Breslow-Wilcoxon test, which  
147 places greater weight on earlier time points [47]. A *pilA* (major pilin) mutant was slightly less  
148 virulent than WT; subsequent comparisons were made relative to *pilA*, since all mutants lack pili.  
149 *fimU* and *pilE* mutants had increased virulence relative to the *pilA* mutant, with similar virulence  
150 to WT. In contrast, *pilW*, *pilX*, and *pilY1* mutants had reduced virulence relative to the *pilA*  
151 mutant, suggesting their reduced virulence was not due to loss of functional T4P. Virulence of  
152 the *pilV* mutant was similar to the *pilA* mutant. The twitching and virulence defects of *pilW*, *pilX*,  
153 and *pilY1* mutants could be partially complemented by expression of the relevant gene *in trans*  
154 (Supplementary Fig S1). The stoichiometry of PilY1 and the MPs is important for optimal T4P  
155 function [23], which may explain the lack of full complementation. To verify that these  
156 phenotypes were not strain-specific, we tested PAO1 transposon-insertion mutants of *pilA*, *fimU*,  
157 *pilV*, *pilW*, *pilX*, *pilY1*, and *pilE* in the SK assay (Fig 1B). Similar to the results in PA14,  
158 PilWXY1 were important for T4P-independent virulence. However, the *fimU* and *pilV* mutants  
159 were also less pathogenic than *pilA*; the PA14 and PAO1 MPs are divergent (61-75% amino acid  
160 similarity), so it is possible that FimU and PilV function slightly differently in PAO1 versus

161 PA14 [48]. To focus on genes that were generally important for virulence of *P. aeruginosa*, we  
162 undertook studies of the mechanism responsible for loss of virulence in the *pilW*, *pilX*, and *pilY1*  
163 mutants.

164

### 165 **PilWXY1 promote virulence in a SadC-independent manner**

166 PilWXY1 were previously proposed to increase c-di-GMP production by SadC, such that  
167 loss of *pilW*, *pilX*, or *pilY1* resulted in a biofilm-deficient phenotype, indicative of low  
168 intracellular c-di-GMP [39, 40, 43]. Therefore, we hypothesized that biofilm defects of *pilW*,  
169 *pilX*, and *pilY1* might impede their ability to colonize the *C. elegans* gut, leading to reduced  
170 virulence. The PA14 and PAO1 parent strains and their cognate *pilA*, *fimU*, *pilV*, *pilW*, *pilX*,  
171 *pilY1*, and *pilE* mutants formed negligible levels of biofilm in liquid SK medium, chosen to  
172 approximate the growth conditions used for the SK assay (Supplementary Fig S2). To assess the  
173 levels of cyclic-di-GMP in these strains, we constructed a luminescence-based *cdrA* promoter  
174 reporter based on an extensively-characterized green fluorescent protein-based reporter system  
175 [44, 49-54]. *cdrA* promoter activity has been positively correlated with c-di-GMP levels, as  
176 measured by liquid chromatography-mass spectrometry [49, 51, 53, 54]. We verified that  
177 overexpression of SadC led to a ~60-fold increase in *cdrA* promoter activity, while  
178 overexpression of AlgR, which positively regulates genes that promote c-di-GMP production  
179 [55, 56], led to a ~2-fold increase in promoter activity that was enhanced to ~4-fold when *algR*  
180 expression was increased with 0.05% L-arabinose (Fig 2A). Deletion of *sadC* or *algR* led to a  
181 ~2-fold decrease in *cdrA* promoter activity relative to WT. *cdrA* promoter activity in WT is  
182 expected to be relatively low in liquid media because c-di-GMP levels increase upon surface  
183 attachment [43]. Compared to WT, *pilW*, *pilX*, and *pilY1* had ~3-fold lower *cdrA* promoter



184 activity, indicative of reduced c-di-GMP (Fig 2B). These results are consistent with reports that  
185 PilWXY1 promote c-di-GMP production via SadC [39, 40, 43]. We next investigated whether  
186 SadC was required for virulence towards *C. elegans*, as would be predicted if decreased  
187 virulence in *pilW*, *pilX*, and *pilY1* mutants was due to dysregulation of SadC activity. A small  
188 decrease in virulence towards *C. elegans* was previously reported for a PA14 *sadC* mutant [57];  
189 however, we saw no difference in virulence between WT and a *sadC* mutant in either the PA14  
190 or PAO1 backgrounds (Supplementary Fig S3). Further, overexpression of SadC led to a hyper-  
191 biofilm phenotype *in vitro* in SK medium, but a slight reduction in virulence, demonstrating that  
192 the amount of biofilm formed *in vitro* does not correlate with virulence in *C. elegans* (Fig 3).  
193 Although the exact mechanisms of *P. aeruginosa* pathogenesis in *C. elegans* are not fully  
194 understood, biofilms were suggested to be important for establishment of infection [57-59]. Our  
195 *in vitro* biofilm data suggests that biofilms may not be a major contributor to *P. aeruginosa*  
196 pathogenesis in this model, but direct visualization and quantification of biofilms within the  
197 nematode gut will be required to support this conclusion.

198

### 199 **PilVWXY1 repress expression of the MP operon**

200 After ruling out involvement of the SadC pathway, we next explored the potential role of  
201 FimS-AlgR in PilWXY1-mediated virulence. Informed by previous work in our laboratory  
202 showing that the sensor kinase PilS of the PilSR TCS interacts directly with PilA in the inner  
203 membrane to decrease PilR-dependent major pilin expression [60], we hypothesized that FimS  
204 interacts with one or more MPs, and that loss of that interaction could lead to activation of AlgR  
205 and subsequent upregulation of the MP operon. Bacterial two-hybrid (BACTH) assays were used  
206 to identify potential interactions between FimS and PilA, FimU, PilV, PilW, PilX, or PilE (Fig

207 4A). We also screened for interaction of FimS and AlgR, which has been inferred but never  
208 demonstrated [19]. Interactions between FimS and each pilin were identified; however, based on  
209 our experience with PilS [60], binding of pilins is necessary but not sufficient for inhibition. We  
210 also demonstrated interaction of FimS and AlgR (Fig 4A), providing further support for the  
211 hypothesis that FimS is the sensor kinase for AlgR.

212 To decipher which MPs might modulate expression of the operon, we monitored  
213 expression from the *fimU* promoter using a *luxCDABE* reporter. Compared to WT PA14, there  
214 was a ~25-fold increase in luminescence in *pilV*, *pilW*, *pilX*, and *pilY1* mutants, which could be  
215 restored to WT levels by expressing the corresponding pilin *in trans* (Fig 4B, Supplementary Fig  
216 S4). *fimU* and *pilA* mutants had ~5-fold increased promoter activity, while a *pilE* mutant was  
217 comparable to WT. *fimS* and *algR* mutants had low baseline luminescence, ~10-fold lower than  
218 WT. To determine whether the increased promoter activity in *pilV*, *pilW*, *pilX*, and *pilY1* mutants  
219 depended on FimS-AlgR, either *fimS* or *algR* was deleted in the *pilY1* mutant background. The  
220 *pilY1 algR* double mutant had low luminescence (~10-fold lower than WT), consistent with  
221 AlgR acting as a positive regulator of the MP operon [40]. Loss of *fimS* in the *pilY1* mutant  
222 background also abolished *fimU* promoter activity (~10-fold lower than WT), supporting the idea  
223 that FimS may monitor PilVWXY1 levels and activate AlgR when levels are low. Based on  
224 these data, PilA, FimU, and PilE are unlikely to modulate FimS-AlgR activity even though they  
225 can interact with FimS.

226 PilVWXY1 were previously proposed to form a complex in the inner membrane, such  
227 that loss of any one component destabilizes the others [24]. Since PilY1 is thought to be cleaved  
228 on the periplasmic side of the inner membrane, it is unlikely to interact directly with the  
229 transmembrane domains of FimS [24]. Thus, we suspected that high *fimU* promoter activity in

230 the *pilY1* mutant was due to reduced levels of one or more of the other pilins. To address this, we  
231 overexpressed FimU, PilV, PilW, PilX, or PilE in the *pilY1* mutant and measured *fimU* promoter  
232 activity. All these strains had luminescence comparable to the *pilY1* mutant (Supplementary Fig  
233 S4). Conversely, distinct effects have been observed in other studies upon overexpression of  
234 PilY1 [39, 40, 43]. Therefore, we overexpressed PilY1 in the *pilW* and *pilX* (high-luminescence)  
235 backgrounds; but PilY1 alone was insufficient to alter *fimU* promoter activity. Together, the data  
236 suggest that no individual component of the PilVWXY1 subcomplex is capable of modulating  
237 FimS activity when others are absent.

238 We also tested whether PilD processing of PilVWX was required for modulation of FimS  
239 activity. We constructed a *pilD* mutant, which lacks twitching motility since unprocessed pilins  
240 remain in the inner membrane [23, 61]. The absence of *pilD* had no impact on *fimU* promoter  
241 activity (Supplementary Fig S5), and a *pilD* mutant had virulence equivalent to a *pilA* mutant,  
242 likely attributable to its lack of T4P. Thus, PilVWX can modulate FimS activity in their  
243 unprocessed form.

244

## 245 **Hyperactivation of AlgR attenuates virulence**

246 Because the results suggested that loss of PilWXY1 relieves feedback inhibition on  
247 FimS-AlgR, resulting in AlgR activation, we tested whether hyperactivation of AlgR alone could  
248 decrease virulence. We made chromosomal *algR*<sub>D54E</sub> phospho-mimetic point mutants [62] in  
249 both PA14 and PAO1 backgrounds. We also made *algR*<sub>D54A</sub> point mutants, as AlgR  
250 phosphorylation is required for transcription of a subset of genes in its regulon, including the MP  
251 operon [17, 62, 63]. We verified that the *algR*<sub>D54A</sub> mutant was defective for twitching motility,  
252 while the *algR*<sub>D54E</sub> mutant had WT twitching (Supplementary Fig S6). Unexpectedly, a *fimS*

253 mutant retained ~50% twitching motility, in contrast to previous reports [18, 62]. In the absence  
254 of FimS, AlgR might be phosphorylated by small phosphate donors [64]. Based on the *fimS* data,  
255 we also questioned the assumption that AlgR phosphorylation was necessary for expression from  
256 the *fimU* promoter. When we overexpressed WT AlgR or AlgR<sub>D54A</sub> in the *algR* mutant  
257 (Supplementary Fig S6), its twitching defect was fully complemented by AlgR, and partially  
258 complemented (25%) by AlgR<sub>D54A</sub>. Thus, although it increases binding to the *fimU* promoter [17,  
259 62], phosphorylation of AlgR is not essential for transcription of the MP operon.

260 SK assays were then performed for PA14 and PAO1 *algR*<sub>D54A</sub> and *algR*<sub>D54E</sub> mutants, plus  
261 PA14 and PAO1 *fimS* and *algR* deletion mutants. PA14 and PAO1 *algR*<sub>D54E</sub> mutants were less  
262 pathogenic than the corresponding WT strains, while *fimS*, *algR* and *algR*<sub>D54A</sub> mutants had WT  
263 virulence (Fig 5AB). Loss of FimS-AlgR decreases expression of the MPs and PilY1 and  
264 prevents pilus assembly [17, 40]. Because our data show that loss of FimS-AlgR (and thus MP  
265 expression) had no impact on virulence, we conclude that reduced virulence of *pilW*, *pilX*, and  
266 *pilY1* mutants is due to the resulting activation of FimS-AlgR.

267

### 268 **Overexpression of AlgR attenuates virulence**

269 Increased transcription of *fimS-algR* in a *pilY1* mutant relative to WT has been reported  
270 [38], suggesting that reduced virulence could arise through expression of increased amounts of  
271 the FimS-AlgR TCS, as well as its activation. Therefore, we asked whether increased AlgR  
272 levels would attenuate virulence, as previously demonstrated in a mouse infection model [65].  
273 When *algR* was expressed *in trans* from a multicopy plasmid in PA14 *algR*, virulence was  
274 reduced compared to the vector control (Fig 6A). Because un-phosphorylated AlgR can also  
275 affect transcription of a subset of genes [66, 67], we tested the same mutant complemented with

276 AlgR<sub>D54A</sub>. Complementation of the *algR* mutant with AlgR<sub>D54A</sub> resulted in a severe virulence  
277 defect relative to the vector-only control. Thus, AlgR hyperactivation and overexpression  
278 independently diminish *P. aeruginosa* virulence towards *C. elegans*. Lastly, as AlgR is a positive  
279 regulator of biofilm formation [17, 55, 56], we performed biofilm assays for PA14 *algR*  
280 complemented with AlgR or AlgR<sub>D54A</sub>. Expression of either variant led to hyper-biofilm  
281 formation (Fig 6B), further emphasizing that the ability of a strain to form biofilms in SK  
282 medium does not correlate with virulence in worms. Instead, we suggest that virulence factors  
283 repressed by FimS-AlgR are important for *C. elegans* SK, and an increase in AlgR levels and/or  
284 activity attenuates virulence.

285

### 286 **The virulence defects of *pilW*, *pilX* and *pilY1* mutants are dependent on FimS-AlgR**

287 To provide further support for this model, we asked whether the virulence defects of  
288 PA14 *pilW*, *pilX*, and *pilY1* mutants required FimS-AlgR. We deleted *fimS* or *algR* in the *pilW*,  
289 *pilX*, and *pilY1* backgrounds, and tested virulence of the double mutants (Fig 7). We also deleted  
290 *pilW*, *pilX*, and *pilY1* in the *algR*<sub>D54A</sub> background, to test if AlgR activation was necessary for the  
291 loss of virulence in *pilW*, *pilX*, and *pilY1* mutants. In all cases, the double mutants had WT  
292 virulence, equivalent to that of the *fimS*, *algR*, or *algR*<sub>D54A</sub> single mutants. These results  
293 demonstrate that decreased virulence resulting from loss of PilWXY1 requires both FimS and  
294 AlgR. Although overexpression of AlgR<sub>D54A</sub> *in trans* repressed virulence (Fig 6A), the  
295 chromosomal mutation was sufficient to alleviate the virulence defect of *pilW*, *pilX*, and *pilY1*  
296 mutants, suggesting that AlgR phosphorylation is important for PilWXY1-modulated virulence.

297 The sigma factor AlgU (AlgT/ $\sigma^{22}/\sigma^E$ ) acts upstream of FimS-AlgR to promote *algR*  
298 transcription [68-70], thus we tested its potential involvement in modulation of virulence by

299 PilWXY1. An *algU* mutant was more virulent than WT (Fig 8), as previously demonstrated in  
300 mouse models [71], while *pilW algU*, *pilX algU*, and *pilY1 algU* double mutants had near-WT  
301 virulence (less than an *algU* mutant, but more than *pilW*, *pilX*, and *pilY1* single mutants).  
302 Although AlgU promotes *algR* transcription [69], loss of AlgU alone does not prevent expression  
303 of AlgR [68]. Given the reduced virulence of the *pilW algU*, *pilX algU*, and *pilY1 algU* double  
304 mutants relative to *algU*, PilWXY1 modulation of FimS-AlgR signalling appears to be intact in  
305 the *algU* mutant. These data are consistent with studies showing that *mucA* and *mucD* mutants,  
306 in which *algR* and *algU* are highly transcribed [69, 72-74], are less virulent towards *C. elegans*  
307 [75-77].

308

## 309 Discussion

310 *P. aeruginosa* uses T4P to attach to surfaces and host cells, for biofilm maturation, and to  
311 move across surfaces via twitching motility [2]. The MPs and PilY1 are important players in T4P  
312 biogenesis and function, but also in regulation of swarming motility, surface attachment,  
313 mechanosensation, and virulence [38-40, 43]. The MP operon is positively regulated by FimS-  
314 AlgR, a TCS implicated in regulation of chronic *P. aeruginosa* lung infections [17-19]. Here, we  
315 explored the connection between loss of PilWXY1 (and thus, loss of T4P) and AlgR activation in  
316 virulence towards *C. elegans*, as summarized in Fig 9. We showed that *pilW*, *pilX*, and *pilY1*  
317 mutants were less virulent than WT or a *pilA* mutant, supporting the idea that PilWXY1  
318 modulate virulence independently of their role in T4P assembly. We confirmed previous reports  
319 [23, 33, 40] that in the absence of *pilV*, *pilW*, *pilX*, or *pilY1*, expression of the MP operon is  
320 significantly increased, and that this requires FimS-AlgR. Either hyperactivation or

321 overexpression of AlgR reduced virulence, while loss of *fimS* or *algR* in *pilW*, *pilX*, or *pilYI*  
322 reverted virulence to WT levels.

323         These data – coupled with BACTH data showing that the minor pilins interact directly  
324 with FimS in the membrane (Fig 4) – suggest that FimS may act as a molecular thermostat to  
325 monitor MP levels, and in their absence, activates AlgR to upregulate expression of the MP  
326 operon. A similar inventory control mechanism was recently described for the PilSR TCS, where  
327 PilS phosphorylates PilR when PilA levels are low, and dephosphorylates PilR when PilA levels  
328 are high [60]. It is not yet clear if FimS responds to changes in levels of the PilVWXY1  
329 subcomplex, thought to prime assembly of T4P [24, 78, 79]. When overexpressed individually *in*  
330 *trans*, each of the MPs inhibited twitching motility in PAO1 [23], but since the others were still  
331 expressed from the chromosome, the exact nature of the signal detected by FimS remains to be  
332 determined. When expressed *in trans*, no single component of the PilVWXY1 subcomplex  
333 reduced *fimU* promoter activity if others were absent (Supplementary Fig S4). The specific  
334 signal that inhibits FimS activity remains to be deciphered. Whether the FimS-inhibitory signal is  
335 the same in PA14 and PAO1 also remains unknown. Though PilWXY1 were required for  
336 virulence in PA14 and PAO1, FimU and PilV influenced virulence only in PAO1 (Fig 1A-B).  
337 Given the MPs are divergent, FimU and PilV may play different roles in PAO1 versus PA14  
338 [48]. It is possible that FimU and PilV are more important for stability of the PilWXY1  
339 subcomplex in PAO1 than in PA14, and/or that PAO1 FimU and PilV can directly modulate  
340 FimS activity.

341         Kuchma et al. [39, 43] reported that loss of *pilW*, *pilX*, or *pilYI* increased swarming  
342 motility and decreased biofilm formation, both indicative of low c-di-GMP levels. As biofilms  
343 were proposed to contribute to *P. aeruginosa* pathogenesis in *C. elegans*, we investigated

344 whether the reduction in virulence in the absence of PilWXY1 was linked to decreased biofilm  
345 via loss of SadC activation [57-59, 80]. In our hands, levels of *sadC* had no impact on virulence  
346 even though they clearly modulated the amount of biofilm produced in SK media (Fig 3A-B,  
347 Supplementary Fig S3). Irazoqui et al. [59] examined the *C. elegans* gut during *P. aeruginosa*  
348 infection and described extracellular material that they suggested might indicate presence of a  
349 biofilm. Anti-biofilm compounds reduced *P. aeruginosa* virulence towards *C. elegans*, but a  
350 mechanism of action for those compounds has not been described [58]. Recently, the small RNA  
351 *SrbA* was shown to modulate both biofilm and virulence towards *C. elegans*; however, deletion  
352 of *srbA* led to altered transcription of at least 26 other genes that may also affect virulence [81].

353         Rather than using standard biofilm media, we performed these assays in liquid SK media  
354 to more closely mimic the conditions to which bacteria are exposed in the SK assay. To our  
355 knowledge, this is the first report to use SK media for biofilm assays. As we found no correlation  
356 between biofilm formation and virulence, we suggest that acute-phase virulence factors may be  
357 more important for *C. elegans* pathogenesis in the SK model. However, we recognize that *in*  
358 *vitro* biofilm assays may not replicate the conditions within the *C. elegans* gut; direct  
359 visualization of bacteria in worms will be needed to clarify the role of biofilm formation.

360         PilY1 and the MPs have been implicated in surface detection and activation of virulence,  
361 via signalling through SadC [38, 40]. Because loss of PilY1 or the MPs prevents T4P assembly  
362 and function, it is crucial to distinguish phenotypes resulting from lack of specific proteins  
363 versus loss of piliation [24]. Luo et al. [40] suggested that association of PilY1 with surfaces  
364 transduces a signal through the T4P machinery to stimulate c-di-GMP production by SadC, while  
365 Rodesney et al. [44] showed that loss of *pilA*, *pilY1*, or *pilT* prevents surface-activated c-di-GMP  
366 production. Rodesney et al. [44] proposed that both PilY1 and functional T4P are required for



367 mechanosensation; however, it is not possible to delete *pilYI* without ablating T4P assembly.  
368 Our *cdrA* promoter reporter data support the idea that PilWXY1 promote cyclic-di-GMP  
369 production by SadC, as loss of *pilW*, *pilX*, or *pilYI* decreased *cdrA* promoter activity (Fig 2B).  
370 However, we argue that the PilWXY1-SadC pathway – though important for c-di-GMP  
371 signalling – is not critical for virulence towards *C. elegans*. Instead, our data show that  
372 PilWXY1-FimS-AlgR signalling axis is responsible for T4P-independent changes in virulence of  
373 *pilW*, *pilX*, and *pilYI* mutants. Thus, surface attachment may induce c-di-GMP production via  
374 PilWXY1-SadC [40, 43], while the brief trapping of T4P outside the cell upon contact with a  
375 surface might transiently deplete PilVWXY1 levels in the IM, resulting in increased FimS-AlgR  
376 activity and transition towards a sessile, biofilm lifestyle.

377         Whether the loss of *pilW*, *pilX*, or *pilYI* leads to increased amounts of AlgR, its increased  
378 phosphorylation via FimS, or both, remains to be clarified. Okkotsu et al. [62] showed that AlgR  
379 and AlgR<sub>D54E</sub> levels are comparable, suggesting that the loss of virulence we observed for PA14  
380 *algR<sub>D54E</sub>* is attributable to the D54E phospho-mimetic mutation alone. Overexpression of  
381 AlgR<sub>D54A</sub> *in trans* reduced virulence (Fig 6A), but the same mutation on the chromosome  
382 reverted virulence of *pilW*, *pilX*, and *pilYI* mutants to WT levels (Fig 7). Therefore, we suspect  
383 that it is primarily AlgR phosphorylation (or lack of AlgR dephosphorylation) that leads to  
384 decreased virulence. However, it is possible that both increased AlgR protein levels and  
385 phosphorylation contribute to the reduced pathogenicity of *pilW*, *pilX*, and *pilYI* mutants. Kong  
386 et al. [55] showed that AlgR binds *fimS-algR*, suggesting that the TCS could positively regulate  
387 its own transcription in response to reduced PilWXY1 levels.

388         In addition to being essential for T4P function, FimS and AlgR control alginate  
389 production in the context of chronic CF infections, where *algR* transcription is high [18, 82].

390 Phosphorylation of AlgR increases binding affinity at some – but not all – of its target sequences  
391 [17, 62, 63, 67]. For example, AlgR<sub>D54N</sub> failed to support twitching motility, but did not affect  
392 alginate production [17, 63]. Our twitching motility data suggests that AlgR<sub>D54A</sub> is capable of  
393 binding to the *fimU* promoter, albeit less efficiently than WT AlgR (Supplementary Fig S6).  
394 FimS is an unorthodox histidine kinase, with four transmembrane domains instead of the typical  
395 two, and lacks both a periplasmic sensing domain and the canonical motif involved in ATP  
396 coordination that mediates auto-phosphorylation [19, 83]. Direct interaction and/or phospho-  
397 transfer between FimS and AlgR have not been reported. Rather, the idea that FimS acts as a  
398 kinase for AlgR comes from this and other studies demonstrating similar phenotypes for *fimS*,  
399 *algR*, and *algR*<sub>D54N</sub> mutants [17, 18, 84]. Here, we demonstrated that FimS and AlgR interact in  
400 the BACTH assay (Fig 4) lending further support to this model.

401 FimS and AlgR promote expression of genes important for production of alginate,  
402 biofilms, and c-di-GMP, and inhibit expression of virulence factors such as the T3SS, pyocyanin,  
403 and quorum sensing [55, 56, 74, 85, 86]. The observation that the loss of *algR* had no impact on  
404 virulence towards amoebae [38] or nematodes (Fig 5AB) suggests that the AlgR-activated genes  
405 may not contribute to virulence, although the mechanisms of killing could differ. In mouse  
406 models, *fimS* and *algR* deletion mutants are attenuated, though overexpression of AlgR also  
407 markedly reduces virulence [55, 65, 87]. Further, Little et al. demonstrated that PAO1 *algR*<sub>D54E</sub>  
408 had WT virulence in *Drosophila melanogaster* and mouse infection models, while an *algR*<sub>D54A</sub>  
409 mutant had highly attenuated virulence [87]. The outcomes that result from interaction of *P.*  
410 *aeruginosa* with different hosts will depend on a combination of factors including host defenses,  
411 site of infection, available nutrients, and virulence repertoire of a particular strain. However, our

412 results suggest that changes in the specific repertoire of bacterial virulence factors, or the timing  
413 of their production, can tip the balance in the host's favour.

414 The subset of AlgR-regulated virulence genes important for *C. elegans* pathogenesis is  
415 not defined. Screening of a PA14 transposon library for loss of virulence implicated several  
416 genes encoding regulators rather than individual virulence factors, suggesting that *C. elegans*  
417 pathogenesis is multifactorial [35]. Consistent with this hypothesis, a study of 18 WT *P.*  
418 *aeruginosa* strains revealed no correlation between pathogenicity and any specific virulence  
419 factors [88]. We saw WT or greater levels of virulence for *algR* and *algU* mutants, respectively,  
420 consistent with a role for AlgRU in repression of acute phase virulence factors (Figs 5, 8).  
421 Factors under positive control of AlgRU may be important during later stages of infection in  
422 more complex mammalian infection models, but not crucial for pathogenesis in nematodes [89,  
423 90]. In support of this hypothesis, past studies have demonstrated that increased mucoidy, via  
424 mutation of *mucA* or *mucD*, reduced nematode killing [75-77].

425 While important for the initial stages of infection, T4P are less critical in chronic CF lung  
426 infections and are often lost over time [5, 91, 92]. *P. aeruginosa* CF isolates frequently become  
427 mucoid via activation of AlgR, and production of many virulence factors is reduced [82, 93, 94].  
428 Although the two outcomes are not necessarily temporally or mechanistically linked, mutations  
429 that achieve both may be advantageous during chronic CF lung infections. Specifically, loss of  
430 PilWXY1 may be adaptive in the context of CF, leading to AlgR activation and loss of T4P  
431 function. To test this idea, it will be interesting to examine the genotypes of mucoid CF isolates  
432 for these types of mutations. In conclusion, our results suggest that PilWXY1 promote virulence  
433 towards *C. elegans* by inhibiting FimS-AlgR activation. These data demonstrate how loss of one  
434 virulence factor (T4P) may activate others (via AlgR). Because the interplay between virulence

435 factors in *P. aeruginosa* is complex and dynamic, careful consideration will be required when  
436 designing potential anti-virulence therapeutic strategies.

437

## 438 **Materials and methods**

### 439 **Bacterial strains and plasmids**

440 Strains and plasmids used in this work are listed in Supplementary Table S1. Bacteria  
441 were grown at 37°C for 16 h in 5 ml lysogeny broth (LB) Lennox, or on 1.5% agar LB plates,  
442 unless otherwise specified. Plasmids were transformed into chemically-competent *E. coli* by  
443 heat-shock, and into *P. aeruginosa* by electroporation [95]. Where appropriate, gentamicin (Gm)  
444 was added at 15 µg/ml for *E. coli*, and 30 µg/ml for *P. aeruginosa*. Kanamycin (Kan) was added  
445 at 50 µg/ml for *E. coli*, and 150 µg/ml for *P. aeruginosa*. Ampicillin (Amp) was added at 100  
446 µg/ml for *E. coli*. L-arabinose was added at 0.05% where indicated to induce expression from the  
447 pBADGr promoter [96].

448

### 449 **Cloning procedures**

450 Vectors were constructed using standard cloning procedures, using the primers listed in  
451 Supplementary Table S2. Deletion constructs were designed to contain 500-1000 bp homology  
452 upstream and downstream the gene to be deleted. Deletion constructs for PA14 *fimU*, *pilV*, *pilW*,  
453 *pilX*, *pilY1*, and *pilE* were synthesized by Genscript in the pUC57Kan vector. pEX18Gm-*sadC*  
454 was created by amplifying the *sadC* deletion region from PA14 *sadC roeA* [42], followed by  
455 digestion and ligation into pEX18Gm. pEX18Gm-*fimS*, pEX18Gm-*algR*<sub>D54A</sub>, and pEX18Gm-  
456 *algR*<sub>D54E</sub> were made by overlap extension PCR [97]. Restriction digestion followed by ligation of  
457 the upstream and downstream fragments was used to create the deletion constructs pEX18Gm-

458 *algR*, pEX18Gm-*algU*, and pEX18Gm-*pilD*. pMS402-*PfimU* and pMS402-*PcdrA* were created  
459 by amplifying and digesting the promoter regions of the PA14 MP operon and *cdrA* gene,  
460 respectively. Digested pBADGr was treated with alkaline phosphatase prior to ligation to avoid  
461 re-circularization of the vector. Constructs were verified by Sanger sequencing (MOBIX lab,  
462 McMaster, Hamilton, ON).

463

#### 464 **Mutant generation by allelic exchange**

465 Allelic exchange was used to remove or alter specific genes [98]. pEX18Gm suicide  
466 plasmid derivatives (see Cloning procedures and Table 1) were used to create all mutants in this  
467 work. After heat-shock transformation into *E. coli* SM10 cells, pEX18Gm constructs were  
468 conjugated into corresponding PA14 or PAO1 parent strains. Cells were then transferred to  
469 *Pseudomonas* isolation agar (PIA) Gm100 plates and incubated for 18 h at 37°C, to select for  
470 integration of pEX18Gm derivatives into the chromosome. Colonies were streaked onto  
471 LB/sucrose and incubated at 30°C for 18 h to select against merodiploids. Resultant colonies  
472 were patched onto LB and LB Gm30 to identify gentamicin-sensitive colonies. Regions flanking  
473 the desired mutations were amplified and sequenced to confirm success.

474

#### 475 **Twitching motility assays**

476 Twitching motility assays were performed as previously described [99], with the  
477 following modifications. Individual colonies were stab-inoculated in triplicate into 1% agar LB  
478 solidified in plasma-treated tissue culture-grade plates (Thermo Fisher) and incubated at 30°C for  
479 48 h. Agar was carefully removed and plates were stained with 1% crystal violet for 5 min.

480 Unbound dye was removed by rinsing with water, then stained twitching areas were measured  
481 using ImageJ. Twitching zones were normalized to WT (100%).

482

### 483 **Biofilm assays**

484 Biofilm assays were performed as previously described, with modifications [100]. *P.*  
485 *aeruginosa* cultures were grown for 16 h at 37°C, diluted 1:200 in fresh LB, and grown to OD<sub>600</sub>  
486 ~0.1. Cultures were then diluted 1:500 in liquid SK media (50 mM NaCl, 0.35% peptone, 1 mM  
487 CaCl<sub>2</sub>, 1 mM MgSO<sub>4</sub>, 5 µg/ml cholesterol in EtOH, 20 mM KH<sub>2</sub>PO<sub>4</sub>, and 5 mM K<sub>2</sub>HPO<sub>4</sub>), then  
488 96-well plates were inoculated with 150 µl each strain, in triplicate. Sterility controls (liquid SK  
489 media) were included throughout the plate to check for contamination. Plates were covered with  
490 peg lids (Nunc) then wrapped in parafilm and incubated at 37°C for 24 h, shaken at 200 rpm.  
491 After incubation, the OD<sub>600</sub> of the plate was measured to check for uniform growth and lack of  
492 contamination. Peg lids were washed for 10 min in 200 µl/well 1X phosphate-buffered saline  
493 (PBS), then stained with 200 µl/well 0.1% (w/v) crystal violet for 15 min. Unbound crystal violet  
494 was removed by washing lids in 70 ml distilled water 5 times at 10 min intervals. Crystal violet  
495 was solubilized from lids in 200 µl/well 33.3% acetic acid, then the absorbance at 600 nm was  
496 measured. Optical density and absorbance at 600 nm were plotted for growth and biofilm  
497 formation, respectively, then analyzed by one-way ANOVA followed by Dunnett post-test to  
498 compare each mutant to the WT control,  $p = 0.05$ . Error bars indicate standard error of the mean.  
499 Representative wells of acetic acid-solubilized crystal violet were imaged.

500

### 501 ***Caenorhabditis elegans* slow killing assay**

502 SK assays were performed as described previously [101]. SK plates (0.35% peptone, 50  
503 mM NaCl, 2% agar, 1 mM CaCl<sub>2</sub>, 5 µg/ml cholesterol, 1 mM MgSO<sub>4</sub>, 20 mM KH<sub>2</sub>PO<sub>4</sub>, 5 mM  
504 K<sub>2</sub>HPO<sub>4</sub>, 100 µM FUDR) were seeded with 100 µl of an overnight culture and incubated  
505 overnight at 37°C. The following day, plates were enriched with 1 ml of an overnight culture  
506 concentrated to 100 µl. Synchronized L4 worms were collected from *E. coli* OP50 plates, washed  
507 twice in M9 buffer, and then >50 worms were seeded onto each bacterial lawn on individual SK  
508 plates. SK plates were incubated at 25°C and scored for dead worms every 24 h. Worms were  
509 considered dead when they did not respond to touch, and were removed from the plate. OP50  
510 was included as a negative control for virulence. Percent survival was plotted as a function of  
511 time. Survival curves were plotted on GraphPad Prism 5.00 for Windows, then compared using  
512 the Gehan-Breslow-Wilcoxon test,  $p = 0.05$ . Given that larvae were synchronized at 20°C then  
513 transferred at L4 to 25°C for the duration of the assay, worms were at risk of death due to  
514 senescence, rather than direct killing by *P. aeruginosa*, before day 10 [46]. Therefore, the  
515 Gehan-Breslow-Wilcoxon test, which gives weight to earlier timepoints, was used in favour of  
516 the standard log-rank test (notably, all reported differences were also significant by the standard  
517 log-rank test). To correct for multiple analyses, the critical p-value of 0.05 was divided by the  
518 number of pairwise comparisons made within an individual trial, as per the Bonferroni method  
519 [102]. Each assay was performed at least 3 times, and differences were only considered  
520 significant if they were reproducible in the majority of trials. Representative trials are shown; all  
521 replicates can be viewed in the Supplemental Material (Supplementary File S1).

522

523 **Luminescent reporter assay**

524 Luminescent reporter assays were performed as previously described, with minor  
525 modifications [60]. Various strains harbouring the pMS402-*PfimU* or pMS402-*PcdrA* plasmids,  
526 encoding the luciferase genes under control of the *fimU* or *cdrA* promoters, respectively, were  
527 grown for 16 h at 37°C in LB Kan150, then diluted 1:50 in fresh liquid SK media with Kan150,  
528 in addition to Gm30 and 0.05% L-arabinose where appropriate. Subsequently, 100 µl of each  
529 culture was added to white-walled, clear-bottom 96-well plates (Corning) in triplicate, and  
530 incubated with shaking at 37°C in a Synergy 4 microtiter plate reader (BioTek). Luminescence  
531 readings were taken every 15 min for 5 h, and normalized to growth (OD<sub>600</sub>) at each time point.  
532 Readings that exceeded the limit of detection (>4 000 000 luminescence units) were discarded.  
533 At least 3 individual trials were performed. Error bars indicate standard error of the mean.

534

#### 535 **Bacterial two-hybrid β-galactosidase activity assay**

536 To test for interactions between FimS and AlgR or individual pilins, bacterial two-hybrid  
537 (BACTH) assays were performed as previously described [103]. pUT18C and pKT25  
538 derivatives, encoding the T18 and T25 domains of the *Bordetella pertussis* CyaA adenylate  
539 cyclase fused to the N-terminus of FimS, AlgR, PilA, FimU, PilV, PilW, PilX, or PilE [24, 60,  
540 104], were co-transformed into *E. coli* BTH 101 to screen for pairwise interactions. Single  
541 colonies were inoculated in 5 ml LB Amp100 Kan50 and grown overnight. The following day,  
542 100 µl was inoculated into 5 ml fresh media and grown to OD<sub>600</sub> = 0.6, then 5 µl was spotted  
543 onto MacConkey plates (1.5% agar, 100µg/ml ampicillin, 50µg/ml kanamycin, 1% (w/v)  
544 maltose, 0.5mM isopropyl b-D-thiogalactopyranoside) (Difco) or LB Amp100 Kan50 plates  
545 supplemented with 100 µl of 20 mg/ml X-gal. Plates were incubated at 30°C for 24 h. An  
546 interaction was considered positive when colonies appeared pink or blue on MacConkey and LB



547 + X-gal plates, respectively. BTH 101 expressing pUT18C and pKT25 empty vectors was used  
548 as a negative control, and BTH 101 expressing pUT18C-*fimS* and pKT25-*fimS* was used as a  
549 positive control [49].

550

## 551 **References**

- 552 1. Global priority list of antibiotic-resistant bacteria to guide research, discovery, and  
553 development of new antibiotics [Internet]. World Health Organization 2017. Available from:  
554 [http://www.who.int/medicines/publications/WHO-PPL-Short\\_Summary\\_25Feb-](http://www.who.int/medicines/publications/WHO-PPL-Short_Summary_25Feb-ET_NM_WHO.pdf)  
555 [ET\\_NM\\_WHO.pdf](http://www.who.int/medicines/publications/WHO-PPL-Short_Summary_25Feb-ET_NM_WHO.pdf)
- 556 2. Burrows LL. *Pseudomonas aeruginosa* twitching motility: type IV pili in action. Annu  
557 Rev Microbiol. 2012;66:493-520.
- 558 3. Hospenthal MK, Costa TRD, Waksman G. A comprehensive guide to pilus biogenesis in  
559 Gram-negative bacteria. Nat Rev Micro. 2017;15(6):365-79. doi: 10.1038/nrmicro.2017.40.
- 560 4. Berry J-L, Pelicic V. Exceptionally widespread nanomachines composed of type IV  
561 pilins: the prokaryotic Swiss Army knives. FEMS Microbiol Rev. 2015;39(1):1-21. doi:  
562 10.1093/femsre/fuu001. PubMed PMID: PMC4471445.
- 563 5. Mahenthiralingam E, Campbell ME, Speert DP. Nonmotility and phagocytic resistance of  
564 *Pseudomonas aeruginosa* isolates from chronically colonized patients with cystic fibrosis. Infect  
565 Immun. 1994;62(2):596-605. PubMed PMID: PMC186146.
- 566 6. Chi E, Mehl T, Nunn D, Lory S. Interaction of *Pseudomonas aeruginosa* with A549  
567 pneumocyte cells. Infect Immun. 1991;59(3):822-8. PubMed PMID: PMC258333.
- 568 7. Doig P, Todd T, Sastry PA, Lee KK, Hodges RS, Paranchych W, et al. Role of pili in  
569 adhesion of *Pseudomonas aeruginosa* to human respiratory epithelial cells. Infect Immun.

- 570 1988;56(6):1641-6. Epub 1988/06/01. PubMed PMID: 2897336; PubMed Central PMCID:  
571 PMCPMC259449.
- 572 8. Pier GB, Meluleni G, Neuger E. A murine model of chronic mucosal colonization by  
573 *Pseudomonas aeruginosa*. Infect Immun. 1992;60(11):4768-76. PubMed PMID: PMC258230.
- 574 9. Saiman L, Ishimoto K, Lory S, Prince A. The effect of piliation and exoproduct  
575 expression on the adherence of *Pseudomonas aeruginosa* to respiratory epithelial monolayers. J  
576 Infect Dis. 1990;161(3):541-8. Epub 1990/03/01. PubMed PMID: 1968936.
- 577 10. Zoutman DE, Hulbert WC, Pasloske BL, Joffe AM, Volpel K, Trebilcock MK, et al. The  
578 role of polar pili in the adherence of *Pseudomonas aeruginosa* to injured canine tracheal cells: a  
579 semiquantitative morphologic study. Scanning Microsc. 1991;5(1):109-26. Epub 1991/03/01.  
580 PubMed PMID: 1675811.
- 581 11. Comolli JC, Hauser AR, Waite L, Whitchurch CB, Mattick JS, Engel JN. *Pseudomonas*  
582 *aeruginosa* gene products PilT and PilU are required for cytotoxicity in vitro and virulence in a  
583 mouse model of acute pneumonia. Infect Immun. 1999;67(7):3625-30. PubMed PMID:  
584 PMC116553.
- 585 12. Alm RA, Hallinan JP, Watson AA, Mattick JS. Fimbrial biogenesis genes of  
586 *Pseudomonas aeruginosa*: *pilW* and *pilX* increase the similarity of type 4 fimbriae to the GSP  
587 protein-secretion systems and *pilYI* encodes a gonococcal PilC homologue. Mol Microbiol.  
588 1996;22(1):161-73. Epub 1996/10/01. PubMed PMID: 8899718.
- 589 13. Alm RA, Mattick JS. Identification of a gene, *pilV*, required for type 4 fimbrial  
590 biogenesis in *Pseudomonas aeruginosa*, whose product possesses a pre-pilin-like leader  
591 sequence. Mol Microbiol. 1995;16(3):485-96. Epub 1995/05/01. PubMed PMID: 7565109.

- 592 14. Alm RA, Mattick JS. Identification of two genes with prepilin-like leader sequences  
593 involved in type 4 fimbrial biogenesis in *Pseudomonas aeruginosa*. J Bacteriol.  
594 1996;178(13):3809-17. Epub 1996/07/01. PubMed PMID: 8682785; PubMed Central PMCID:  
595 PMCPMC232641.
- 596 15. Russell MA, Darzins A. The *pilE* gene product of *Pseudomonas aeruginosa*, required for  
597 pilus biogenesis, shares amino acid sequence identity with the N-termini of type 4 prepilin  
598 proteins. Mol Microbiol. 1994;13(6):973-85. Epub 1994/09/01. PubMed PMID: 7854130.
- 599 16. Hobbs M, Collie ES, Free PD, Livingston SP, Mattick JS. PilS and PilR, a two-  
600 component transcriptional regulatory system controlling expression of type 4 fimbriae in  
601 *Pseudomonas aeruginosa*. Mol Microbiol. 1993;7(5):669-82. Epub 1993/03/01. PubMed PMID:  
602 8097014.
- 603 17. Belete B, Lu H, Wozniak DJ. *Pseudomonas aeruginosa* AlgR regulates type IV pilus  
604 biosynthesis by activating transcription of the *fimU-pilVWXYZIY2E* operon. J Bacteriol.  
605 2008;190(6):2023-30. doi: 10.1128/jb.01623-07.
- 606 18. Whitchurch CB, Alm RA, Mattick JS. The alginate regulator AlgR and an associated  
607 sensor FimS are required for twitching motility in *Pseudomonas aeruginosa*. Proc Natl Acad Sci  
608 U S A. 1996;93(18):9839-43. Epub 1996/09/03. PubMed PMID: 8790418; PubMed Central  
609 PMCID: PMCPMC38516.
- 610 19. Okkotsu Y, Little AS, Schurr MJ. The *Pseudomonas aeruginosa* AlgZR two-component  
611 system coordinates multiple phenotypes. Front Cell Infect Microbiol. 2014;4:82. doi:  
612 10.3389/fcimb.2014.00082. PubMed PMID: PMC4064291.

- 613 20. Wolfgang MC, Lee VT, Gilmore ME, Lory S. Coordinate regulation of bacterial  
614 virulence genes by a novel adenylate cyclase-dependent signaling pathway. *Dev Cell*.  
615 2003;4(2):253-63. doi: 10.1016/S1534-5807(03)00019-4.
- 616 21. Yu H, Mudd M, Boucher JC, Schurr MJ, Deretic V. Identification of the *algZ* gene  
617 upstream of the response regulator *algR* and its participation in control of alginate production in  
618 *Pseudomonas aeruginosa*. *J Bacteriol*. 1997;179(1):187-93. Epub 1997/01/01. PubMed PMID:  
619 8981997; PubMed Central PMCID: PMC178678.
- 620 22. Strom MS, Bergman P, Lory S. Identification of active-site cysteines in the conserved  
621 domain of PilD, the bifunctional type IV pilin leader peptidase/N-methyltransferase of  
622 *Pseudomonas aeruginosa*. *J Biol Chem*. 1993;268(21):15788-94. Epub 1993/07/25. PubMed  
623 PMID: 8340405.
- 624 23. Giltner CL, Habash M, Burrows LL. *Pseudomonas aeruginosa* minor pilins are  
625 incorporated into type IV pili. *J Mol Biol*. 2010;398(3):444-61. Epub 2010/03/27. doi:  
626 10.1016/j.jmb.2010.03.028. PubMed PMID: 20338182.
- 627 24. Nguyen Y, Sugiman-Marangos S, Harvey H, Bell SD, Charlton CL, Junop MS, et al.  
628 *Pseudomonas aeruginosa* minor pilins prime type IVa pilus assembly and promote surface  
629 display of the PilY1 adhesin. *J Biol Chem*. 2015;290(1):601-11. doi: 10.1074/jbc.M114.616904.  
630 PubMed PMID: PMC4281761.
- 631 25. Sauvonnnet N, Vignon G, Pugsley AP, Gounon P. Pilus formation and protein secretion by  
632 the same machinery in *Escherichia coli*. *EMBO J*. 2000;19(10):2221-8. doi:  
633 10.1093/emboj/19.10.2221. PubMed PMID: PMC384360.

- 634 26. McCallum M, Tammam S, Khan A, Burrows LL, Howell PL. The molecular mechanism  
635 of the type IVa pilus motors. *Nat Commun.* 2017;8:15091. doi: 10.1038/ncomms15091. PubMed  
636 PMID: PMC5424180.
- 637 27. Ramer SW, Schoolnik GK, Wu C-Y, Hwang J, Schmidt SA, Bieber D. The type IV pilus  
638 assembly complex: biogenic interactions among the bundle-forming pilus proteins of  
639 enteropathogenic *Escherichia coli*. *J Bacteriol.* 2002;184(13):3457-65. doi:  
640 10.1128/JB.184.13.3457-3465.2002. PubMed PMID: PMC135125.
- 641 28. Winther-Larsen HC, Wolfgang M, Dunham S, Van Putten JPM, Dorward D, Løvold C, et  
642 al. A conserved set of pilin-like molecules controls type IV pilus dynamics and organelle-  
643 associated functions in *Neisseria gonorrhoeae*. *Mol Microbiol.* 2005;56(4):903-17. doi:  
644 10.1111/j.1365-2958.2005.04591.x.
- 645 29. Carbonnelle E, Helaine S, Nassif X, Pelicic V. A systematic genetic analysis in *Neisseria*  
646 *meningitidis* defines the Pil proteins required for assembly, functionality, stabilization and export  
647 of type IV pili. *Mol Microbiol.* 2006;61(6):1510-22. doi: 10.1111/j.1365-2958.2006.05341.x.
- 648 30. Chang Y-W, Rettberg LA, Treuner-Lange A, Iwasa J, Søgaard-Andersen L, Jensen GJ.  
649 Architecture of the type IVa pilus machine. *Science.* 2016;351(6278).
- 650 31. Heiniger RW, Winther-Larsen HC, Pickles RJ, Koomey M, Wolfgang MC. Infection of  
651 human mucosal tissue by *Pseudomonas aeruginosa* requires sequential and mutually dependent  
652 virulence factors and a novel pilus-associated adhesin. *Cell Microbiol.* 2010;12(8):1158-73. doi:  
653 10.1111/j.1462-5822.2010.01461.x.
- 654 32. Wolfgang M, Park H-S, Hayes SF, van Putten JPM, Koomey M. Suppression of an  
655 absolute defect in type IV pilus biogenesis by loss-of-function mutations in *pilT*, a twitching

- 656 motility gene in *Neisseria gonorrhoeae*. Proc Natl Acad Sci U S A. 1998;95(25):14973-8.  
657 PubMed PMID: PMC24560.
- 658 33. Bohn Y-ST, Brandes G, Rakhimova E, Horatzek S, Salunkhe P, Munder A, et al.  
659 Multiple roles of *Pseudomonas aeruginosa* TBCF10839 PilY1 in motility, transport and  
660 infection. Mol Microbiol. 2009;71(3):730-47. doi: 10.1111/j.1365-2958.2008.06559.x.
- 661 34. Garvis S, Munder A, Ball G, de Bentzmann S, Wiehlmann L, Ewbank JJ, et al.  
662 *Caenorhabditis elegans* semi-automated liquid screen reveals a specialized role for the  
663 chemotaxis gene *cheB2* in *Pseudomonas aeruginosa* virulence. PLOS Pathog.  
664 2009;5(8):e1000540. doi: 10.1371/journal.ppat.1000540. PubMed PMID: PMC2714965.
- 665 35. Feinbaum RL, Urbach JM, Liberati NT, Djonovic S, Adonizio A, Carvunis A-R, et al.  
666 Genome-wide identification of *Pseudomonas aeruginosa* virulence-related genes using a  
667 *Caenorhabditis elegans* infection model. PLOS Pathog. 2012;8(7):e1002813. doi:  
668 10.1371/journal.ppat.1002813.
- 669 36. Lewenza S, Charron-Mazenod L, Giroux L, Zamponi AD. Feeding behaviour of  
670 *Caenorhabditis elegans* is an indicator of *Pseudomonas aeruginosa* PAO1 virulence. PeerJ.  
671 2014;2:e521. doi: 10.7717/peerj.521. PubMed PMID: PMC4137669.
- 672 37. Jansen G, Crummenerl LL, Gilbert F, Mohr T, Pfefferkorn R, Thänert R, et al.  
673 Evolutionary transition from pathogenicity to commensalism: global regulator mutations mediate  
674 fitness gains through virulence attenuation. Mol Biol Evol. 2015;32(11):2883-96. doi:  
675 10.1093/molbev/msv160.
- 676 38. Siryaporn A, Kuchma SL, O'Toole GA, Gitai Z. Surface attachment induces  
677 *Pseudomonas aeruginosa* virulence. Proc Natl Acad Sci U S A. 2014;111(47):16860-5. doi:  
678 10.1073/pnas.1415712111.

- 679 39. Kuchma SL, Ballok AE, Merritt JH, Hammond JH, Lu W, Rabinowitz JD, et al. Cyclic-  
680 di-GMP-mediated repression of swarming motility by *Pseudomonas aeruginosa*: the *pilY1* gene  
681 and its impact on surface-associated behaviors. J Bacteriol. 2010;192(12):2950-64. doi:  
682 10.1128/jb.01642-09.
- 683 40. Luo Y, Zhao K, Baker AE, Kuchma SL, Coggan KA, Wolfgang MC, et al. A hierarchical  
684 cascade of second messengers regulates *Pseudomonas aeruginosa* surface behaviors. mBio.  
685 2015;6(1). doi: 10.1128/mBio.02456-14.
- 686 41. Persat A, Inclan YF, Engel JN, Stone HA, Gitai Z. Type IV pili mechanochemically  
687 regulate virulence factors in *Pseudomonas aeruginosa*. Proc Natl Acad Sci U S A.  
688 2015;112(24):7563-8. Epub 2015/06/05. doi: 10.1073/pnas.1502025112. PubMed PMID:  
689 26041805; PubMed Central PMCID: PMC4475988.
- 690 42. Merritt JH, Brothers KM, Kuchma SL, O'Toole GA. SadC reciprocally influences biofilm  
691 formation and swarming motility via modulation of exopolysaccharide production and flagellar  
692 function. J Bacteriol. 2007;189(22):8154-64. Epub 2007/06/26. doi: 10.1128/jb.00585-07.  
693 PubMed PMID: 17586642; PubMed Central PMCID: PMC4475988.
- 694 43. Kuchma SL, Griffin EF, O'Toole GA. Minor pilins of the type IV pilus system participate  
695 in the negative regulation of swarming motility. J Bacteriol. 2012;194(19):5388-403. doi:  
696 10.1128/JB.00899-12. PubMed PMID: PMC3457191.
- 697 44. Rodesney CA, Roman B, Dhamani N, Cooley BJ, Katira P, Touhami A, et al.  
698 Mechanosensing of shear by *Pseudomonas aeruginosa* leads to increased levels of the cyclic-di-  
699 GMP signal initiating biofilm development. Proc Natl Acad Sci U S A. 2017;114(23):5906-11.  
700 doi: 10.1073/pnas.1703255114.

- 701 45. Gallagher LA, Manoil C. *Pseudomonas aeruginosa* PAO1 kills *Caenorhabditis elegans*  
702 by cyanide poisoning. J Bacteriol. 2001;183(21):6207-14. doi: 10.1128/JB.183.21.6207-  
703 6214.2001. PubMed PMID: PMC100099.
- 704 46. Zhang B, Xiao R, Ronan EA, He Y, Hsu A-L, Liu J, et al. Environmental temperature  
705 differentially modulates *C. elegans* longevity through a thermosensitive TRP channel. Cell Rep.  
706 2015;11(9):1414-24. doi: 10.1016/j.celrep.2015.04.066. PubMed PMID: PMC4758836.
- 707 47. Machin D, Cheung YB, Parmar MKB. Comparison of survival curves. Survival analysis:  
708 a practical approach. 2nd ed: John Wiley & Sons, Ltd; 2006. p. 51-90.
- 709 48. Giltner CL, Rana N, Lunardo MN, Hussain AQ, Burrows LL. Evolutionary and  
710 functional diversity of the *Pseudomonas type IVa* pilin island. Environ Microbiol.  
711 2011;13(1):250-64. doi: 10.1111/j.1462-2920.2010.02327.x.
- 712 49. Rybtke MT, Borlee BR, Murakami K, Irie Y, Hentzer M, Nielsen TE, et al.  
713 Fluorescence-based reporter for gauging cyclic di-GMP levels in *Pseudomonas aeruginosa*.  
714 Appl Environ Microbiol. 2012;78(15):5060-9. doi: 10.1128/AEM.00414-12. PubMed PMID:  
715 PMC3416407.
- 716 50. Moscoso JA, Jaeger T, Valentini M, Hui K, Jenal U, Filloux A. The diguanylate cyclase  
717 SadC is a central player in Gac/Rsm-mediated biofilm formation in *Pseudomonas aeruginosa*. J  
718 Bacteriol. 2014;196(23):4081-8. Epub 2014/09/17. doi: 10.1128/jb.01850-14. PubMed PMID:  
719 25225264; PubMed Central PMCID: PMC4248864.
- 720 51. Bouffartigues E, Moscoso JA, Duchesne R, Rosay T, Fito-Boncompagni L, Gicquel G, et  
721 al. The absence of the *Pseudomonas aeruginosa* OprF protein leads to increased biofilm  
722 formation through variation in c-di-GMP level. Front Microbiol. 2015;6:630. doi:  
723 10.3389/fmicb.2015.00630. PubMed PMID: PMC4477172.



- 724 52. Li K, Yang G, Debru AB, Li P, Zong L, Li P, et al. SuhB regulates the motile-sessile  
725 switch in *Pseudomonas aeruginosa* through the Gac/Rsm pathway and c-di-GMP signaling.  
726 Front Microbiol. 2017;8(1045). doi: 10.3389/fmicb.2017.01045.
- 727 53. Nair HAS, Periasamy S, Yang L, Kjelleberg S, Rice SA. Real time, spatial, and temporal  
728 mapping of the distribution of c-di-GMP during biofilm development. J Biol Chem.  
729 2017;292(2):477-87. doi: 10.1074/jbc.M116.746743. PubMed PMID: PMC5241725.
- 730 54. Valentini M, Laventie B-J, Moscoso J, Jenal U, Filloux A. The diguanylate cyclase HsbD  
731 intersects with the HptB regulatory cascade to control *Pseudomonas aeruginosa* biofilm and  
732 motility. PLoS Genet. 2016;12(10):e1006354. doi: 10.1371/journal.pgen.1006354.
- 733 55. Kong W, Zhao J, Kang H, Zhu M, Zhou T, Deng X, et al. ChIP-seq reveals the global  
734 regulator AlgR mediating cyclic di-GMP synthesis in *Pseudomonas aeruginosa*. Nucleic Acids  
735 Res. 2015;43(17):8268-82. doi: 10.1093/nar/gkv747. PubMed PMID: PMC4787818.
- 736 56. Morici LA, Carterson AJ, Wagner VE, Frisk A, Schurr JR, Honer zu Bentrup K, et al.  
737 *Pseudomonas aeruginosa* AlgR represses the Rhl quorum-sensing system in a biofilm-specific  
738 manner. J Bacteriol. 2007;189(21):7752-64. Epub 2007/09/04. doi: 10.1128/jb.01797-06.  
739 PubMed PMID: 17766417; PubMed Central PMCID: PMCPMC2168728.
- 740 57. Zhang L, Fritsch M, Hammond L, Landreville R, Slatculescu C, Colavita A, et al.  
741 Identification of genes involved in *Pseudomonas aeruginosa* biofilm-specific resistance to  
742 antibiotics. PLOS ONE. 2013;8(4):e61625. doi: 10.1371/journal.pone.0061625.
- 743 58. van Tilburg Bernardes E, Charron-Mazenod L, Reading DJ, Reckseidler-Zenteno SL,  
744 Lewenza S. Exopolysaccharide-repressing small molecules with antibiofilm and antivirulence  
745 activity against *Pseudomonas aeruginosa*. Antimicrob Agents Chemother. 2017. doi:  
746 10.1128/aac.01997-16.

- 747 59. Irazoqui JE, Troemel ER, Feinbaum RL, Luhachack LG, Cezairliyan BO, Ausubel FM.  
748 Distinct pathogenesis and host responses during infection of *C. elegans* by *P. aeruginosa* and *S.*  
749 *aureus*. PLOS Pathog. 2010;6:e1000982. Epub 2010/07/10. doi: 10.1371/journal.ppat.1000982.  
750 PubMed PMID: 20617181; PubMed Central PMCID: PMCPMC2895663.
- 751 60. Kilmury SLN, Burrows LL. Type IV pilins regulate their own expression via direct  
752 intramembrane interactions with the sensor kinase PilS. Proc Natl Acad Sci U S A.  
753 2016;113(21):6017-22. doi: 10.1073/pnas.1512947113.
- 754 61. Strom MS, Lory S. Amino acid substitutions in pilin of *Pseudomonas aeruginosa*. Effect  
755 on leader peptide cleavage, amino-terminal methylation, and pilus assembly. J Biol Chem.  
756 1991;266(3):1656-64. Epub 1991/01/25. PubMed PMID: 1671038.
- 757 62. Okkotsu Y, Tiekou P, Fitzsimmons LF, Churchill ME, Schurr MJ. *Pseudomonas*  
758 *aeruginosa* AlgR phosphorylation modulates rhamnolipid production and motility. J Bacteriol.  
759 2013;195(24):5499-515. Epub 2013/10/08. doi: 10.1128/jb.00726-13. PubMed PMID:  
760 24097945; PubMed Central PMCID: PMCPMC3889618.
- 761 63. Whitchurch CB, Erova TE, Emery JA, Sargent JL, Harris JM, Semmler AB, et al.  
762 Phosphorylation of the *Pseudomonas aeruginosa* response regulator AlgR is essential for type IV  
763 fimbria-mediated twitching motility. J Bacteriol. 2002;184(16):4544-54. Epub 2002/07/27.  
764 PubMed PMID: 12142425; PubMed Central PMCID: PMCPMC135261.
- 765 64. Deretic V, Leveau JH, Mohr CD, Hibler NS. In vitro phosphorylation of AlgR, a  
766 regulator of mucoidy in *Pseudomonas aeruginosa*, by a histidine protein kinase and effects of  
767 small phospho-donor molecules. Mol Microbiol. 1992;6(19):2761-7. Epub 1992/10/01. PubMed  
768 PMID: 1435255.

- 769 65. Lizewski SE, Lundberg DS, Schurr MJ. The transcriptional regulator AlgR is essential  
770 for *Pseudomonas aeruginosa* pathogenesis. *Infect Immun.* 2002;70(11):6083-93. doi:  
771 10.1128/IAI.70.11.6083-6093.2002. PubMed PMID: PMC130412.
- 772 66. Stacey SD, Williams DA, Pritchett CL. The *Pseudomonas aeruginosa* two-component  
773 regulator AlgR directly activates *rsmA* expression in a phosphorylation independent manner. *J*  
774 *Bacteriol.* 2017. doi: 10.1128/jb.00048-17.
- 775 67. Ma S, Selvaraj U, Ohman DE, Quarless R, Hassett DJ, Wozniak DJ. Phosphorylation-  
776 independent activity of the response regulators AlgB and AlgR in promoting alginate  
777 biosynthesis in mucoid *Pseudomonas aeruginosa*. *J Bacteriol.* 1998;180(4):956-68. Epub  
778 1998/02/24. PubMed PMID: 9473053; PubMed Central PMCID: PMC106978.
- 779 68. Pritchett CL, Little AS, Okkotsu Y, Frisk A, Cody WL, Covey CR, et al. Expression  
780 analysis of the *Pseudomonas aeruginosa* AlgZR two-component regulatory system. *J Bacteriol.*  
781 2015;197(4):736-48. doi: 10.1128/JB.02290-14. PubMed PMID: PMC4334192.
- 782 69. Wozniak DJ, Ohman DE. Transcriptional analysis of the *Pseudomonas aeruginosa* genes  
783 *algR*, *algB*, and *algD* reveals a hierarchy of alginate gene expression which is modulated by  
784 *algT*. *J Bacteriol.* 1994;176(19):6007-14. PubMed PMID: PMC196818.
- 785 70. Falcone M, Ferrara S, Rossi E, Johansen HK, Molin S, Bertoni G. The small RNA ErsA  
786 of *Pseudomonas aeruginosa* contributes to biofilm development and motility through post-  
787 transcriptional modulation of AmrZ. *Front Microbiol.* 2018;9(238). doi:  
788 10.3389/fmicb.2018.00238.
- 789 71. Yu H, Boucher JC, Hibler NS, Deretic V. Virulence properties of *Pseudomonas*  
790 *aeruginosa* lacking the extreme-stress sigma factor AlgU (sigmaE). *Infect Immun.*  
791 1996;64(7):2774-81. PubMed PMID: PMC174138.

- 792 72. Damron FH, Yu HD. *Pseudomonas aeruginosa* MucD regulates the alginate pathway  
793 through activation of MucA degradation via MucP proteolytic activity. J Bacteriol.  
794 2011;193(1):286-91. doi: 10.1128/JB.01132-10. PubMed PMID: PMC3019965.
- 795 73. Firoved AM, Deretic V. Microarray analysis of global gene expression in mucoid  
796 *Pseudomonas aeruginosa*. J Bacteriol. 2003;185(3):1071-81. doi: 10.1128/jb.185.3.1071-  
797 1081.2003.
- 798 74. Jones AK, Fulcher NB, Balzer GJ, Urbanowski ML, Pritchett CL, Schurr MJ, et al.  
799 Activation of the *Pseudomonas aeruginosa* AlgU regulon through *mucA* mutation inhibits cyclic  
800 AMP/Vfr signaling. J Bacteriol. 2010;192(21):5709-17. Epub 2010/09/08. doi:  
801 10.1128/jb.00526-10. PubMed PMID: 20817772; PubMed Central PMCID: PMCPMC2953679.
- 802 75. Yorgey P, Rahme LG, Tan MW, Ausubel FM. The roles of *mucD* and alginate in the  
803 virulence of *Pseudomonas aeruginosa* in plants, nematodes and mice. Mol Microbiol.  
804 2001;41(5):1063-76. doi: doi:10.1046/j.1365-2958.2001.02580.x.
- 805 76. Reddy KC, Hunter RC, Bhatla N, Newman DK, Kim DH. *Caenorhabditis elegans* NPR-  
806 1-mediated behaviors are suppressed in the presence of mucoid bacteria. Proc Natl Acad Sci U S  
807 A. 2011;108(31):12887-92. doi: 10.1073/pnas.1108265108. PubMed PMID: PMC3150904.
- 808 77. Rau MH, Hansen SK, Johansen HK, Thomsen LE, Workman CT, Nielsen KF, et al.  
809 Early adaptive developments of *Pseudomonas aeruginosa* after the transition from life in the  
810 environment to persistent colonization in the airways of human cystic fibrosis hosts. Environ  
811 Microbiol. 2010;12(6):1643-58. doi: doi:10.1111/j.1462-2920.2010.02211.x.
- 812 78. Korotkov KV, Hol WG. Structure of the GspK-GspI-GspJ complex from the  
813 enterotoxigenic *Escherichia coli* type 2 secretion system. Nat Struct Mol Biol. 2008;15(5):462-8.  
814 Epub 2008/04/29. doi: 10.1038/nsmb.1426. PubMed PMID: 18438417.

- 815 79. Cisneros DA, Bond PJ, Pugsley AP, Campos M, Francetic O. Minor pseudopilin self-  
816 assembly primes type II secretion pseudopilus elongation. *EMBO J.* 2012;31(4):1041-53. doi:  
817 10.1038/emboj.2011.454. PubMed PMID: PMC3280553.
- 818 80. Jenal U, Malone J. Mechanisms of cyclic-di-GMP signaling in bacteria. *Annu Rev Genet.*  
819 2006;40:385-407.
- 820 81. Taylor PK, Van Kessel ATM, Colavita A, Hancock REW, Mah T-F. A novel small RNA  
821 is important for biofilm formation and pathogenicity in *Pseudomonas aeruginosa*. *PLOS ONE.*  
822 2017;12(8):e0182582. doi: 10.1371/journal.pone.0182582. PubMed PMID: PMC5542712.
- 823 82. Darzins A, Chakrabarty AM. Cloning of genes controlling alginate biosynthesis from a  
824 mucoid cystic fibrosis isolate of *Pseudomonas aeruginosa*. *J Bacteriol.* 1984;159(1):9-18. Epub  
825 1984/07/01. PubMed PMID: 6330052; PubMed Central PMCID: PMC215585.
- 826 83. Kim D, Forst S. Genomic analysis of the histidine kinase family in bacteria and archaea.  
827 *Microbiology.* 2001;147(Pt 5):1197-212. Epub 2001/04/26. doi: 10.1099/00221287-147-5-1197.  
828 PubMed PMID: 11320123.
- 829 84. Cody WL, Pritchett CL, Jones AK, Carterson AJ, Jackson D, Frisk A, et al. *Pseudomonas*  
830 *aeruginosa* AlgR controls cyanide production in an AlgZ-dependent manner. *J Bacteriol.*  
831 2009;191(9):2993-3002. Epub 2009/03/10. doi: 10.1128/jb.01156-08. PubMed PMID:  
832 19270096; PubMed Central PMCID: PMC2681793.
- 833 85. Lizewski SE, Schurr JR, Jackson DW, Frisk A, Carterson AJ, Schurr MJ. Identification  
834 of AlgR-regulated genes in *Pseudomonas aeruginosa* by use of microarray analysis. *J Bacteriol.*  
835 2004;186(17):5672-84. doi: 10.1128/jb.186.17.5672-5684.2004.
- 836 86. Intile PJ, Diaz MR, Urbanowski ML, Wolfgang MC, Yahr TL. The AlgZR two-  
837 component system recalibrates the RsmAYZ posttranscriptional regulatory system to inhibit

- 838 expression of the *Pseudomonas aeruginosa* type III secretion system. J Bacteriol.  
839 2014;196(2):357-66. doi: 10.1128/jb.01199-13.
- 840 87. Little AS, Okkotsu Y, Reinhart AA, Damron FH, Barbier M, Barrett B, et al.  
841 *Pseudomonas aeruginosa* AlgR phosphorylation status differentially regulates pyocyanin and  
842 pyoverdine production. mBio. 2018;9(1). doi: 10.1128/mBio.02318-17.
- 843 88. Lee DG, Urbach JM, Wu G, Liberati NT, Feinbaum RL, Miyata S, et al. Genomic  
844 analysis reveals that *Pseudomonas aeruginosa* virulence is combinatorial. Genome Biol.  
845 2006;7(10):R90. doi: 10.1186/gb-2006-7-10-r90.
- 846 89. Moradali MF, Ghods S, Rehm BHA. *Pseudomonas aeruginosa* lifestyle: a paradigm for  
847 adaptation, survival, and persistence. Front Cell Infect Microbiol. 2017;7:39. doi:  
848 10.3389/fcimb.2017.00039. PubMed PMID: PMC5310132.
- 849 90. Lebeaux D, Chauhan A, Rendueles O, Beloin C. From *in vitro* to *in vivo* models of  
850 bacterial biofilm-related infections. Pathogens. 2013;2(2):288-356. doi:  
851 10.3390/pathogens2020288. PubMed PMID: PMC4235718.
- 852 91. Kus JV, Tullis E, Cvitkovitch DG, Burrows LL. Significant differences in type IV pilin  
853 allele distribution among *Pseudomonas aeruginosa* isolates from cystic fibrosis (CF) versus non-  
854 CF patients. Microbiology. 2004;150(5):1315-26. doi: doi:10.1099/mic.0.26822-0.
- 855 92. Pasloske BL, Joffe AM, Sun Q, Volpel K, Paranchych W, Eftekhar F, et al. Serial isolates  
856 of *Pseudomonas aeruginosa* from a cystic fibrosis patient have identical pilin sequences. Infect  
857 Immun. 1988;56(3):665-72. PubMed PMID: PMC259343.
- 858 93. Schurr MJ, Yu H, Martinez-Salazar JM, Hibler NS, Deretic V. Biochemical  
859 characterization and posttranslational modification of AlgU, a regulator of stress response in

- 860 *Pseudomonas aeruginosa*. Biochem Biophys Res Commun. 1995;216(3):874-80. Epub  
861 1995/11/22. PubMed PMID: 7488207.
- 862 94. Martin DW, Schurr MJ, Mudd MH, Govan JR, Holloway BW, Deretic V. Mechanism of  
863 conversion to mucoidy in *Pseudomonas aeruginosa* infecting cystic fibrosis patients. Proc Natl  
864 Acad Sci U S A. 1993;90(18):8377-81. Epub 1993/09/15. PubMed PMID: 8378309; PubMed  
865 Central PMCID: PMCPMC47359.
- 866 95. Dower WJ, Miller JF, Ragsdale CW. High efficiency transformation of *E. coli* by high  
867 voltage electroporation. Nucleic Acids Res. 1988;16(13):6127-45. Epub 1988/07/11. PubMed  
868 PMID: 3041370; PubMed Central PMCID: PMCPMC336852.
- 869 96. Asikyan ML, Kus JV, Burrows LL. Novel proteins that modulate type IV pilus retraction  
870 dynamics in *Pseudomonas aeruginosa*. J Bacteriol. 2008;190(21):7022-34. Epub 2008/09/09.  
871 doi: 10.1128/jb.00938-08. PubMed PMID: 18776014; PubMed Central PMCID:  
872 PMCPMC2580705.
- 873 97. Ho SN, Hunt HD, Horton RM, Pullen JK, Pease LR. Site-directed mutagenesis by  
874 overlap extension using the polymerase chain reaction. Gene. 1989;77(1):51-9.
- 875 98. Hmelo LR, Borlee BR, Almblad H, Love ME, Randall TE, Tseng BS, et al. Precision-  
876 engineering the *Pseudomonas aeruginosa* genome with two-step allelic exchange. Nat Protoc.  
877 2015;10(11):1820-41. Epub 2015/10/23. doi: 10.1038/nprot.2015.115. PubMed PMID:  
878 26492139; PubMed Central PMCID: PMCPMC4862005.
- 879 99. Gallant CV, Daniels C, Leung JM, Ghosh AS, Young KD, Kotra LP, et al. Common  $\beta$ -  
880 lactamases inhibit bacterial biofilm formation. Molec Microbiol. 2005;58(4):1012-24. doi:  
881 10.1111/j.1365-2958.2005.04892.x. PubMed PMID: PMC3097517.

882 100. Wenderska IB, Chong M, McNulty J, Wright GD, Burrows LL. Palmitoyl-DL-carnitine  
883 is a multitarget inhibitor of *Pseudomonas aeruginosa* biofilm development. ChemBioChem.  
884 2011;12(18):2759-66. Epub 2011/11/03. doi: 10.1002/cbic.201100500. PubMed PMID:  
885 22045628.

886 101. Tan MW, Mahajan-Miklos S, Ausubel FM. Killing of *Caenorhabditis elegans* by  
887 *Pseudomonas aeruginosa* used to model mammalian bacterial pathogenesis. Proc Natl Acad Sci  
888 U S A. 1999;96(2):715-20. Epub 1999/01/20. PubMed PMID: 9892699; PubMed Central  
889 PMCID: PMCPMC15202.

890 102. Benjamini Y, Hochberg Y. Controlling the false discovery rate: a practical and powerful  
891 approach to multiple testing. J R Stat Soc Series B Stat Methodol. 1995;57(1):289-300.

892 103. Buensuceso RNC, Nguyen Y, Zhang K, Daniel-Ivad M, Sugiman-Marangos SN,  
893 Fleetwood AD, et al. The conserved tetratricopeptide repeat-containing C-terminal domain of  
894 *Pseudomonas aeruginosa* FimV is required for its cyclic AMP-dependent and -independent  
895 functions. J Bacteriol. 2016;198(16):2263-74. doi: 10.1128/JB.00322-16. PubMed PMID:  
896 PMC4966435.

897 104. Nguyen Y, Harvey H, Sugiman-Marangos S, Bell SD, Buensuceso RNC, Junop MS, et  
898 al. Structural and functional studies of the *Pseudomonas aeruginosa* minor pilin, Pile. J Biol  
899 Chem. 2015;290(44):26856-65. doi: 10.1074/jbc.M115.683334.

900

## 901 **Figure captions**

### 902 **Fig 1. PilWXY1 contribute to T4P-independent virulence.**

903 (A) SK assays for PA14 *pilA*, *fimU*, *pilV*, *pilW*, *pilX*, *pilY1*, and *pilE* mutants. Synchronized L4  
904 worms were seeded onto SK plates and scored for death every 24 h, then plotted as “percent



905 survival” over the course of the assay. “Day” represents the number of days after L4 on which  
906 the plates were scored. PA14 *fimU* and *pilE* mutants had similar virulence to WT, *pilA* and *pilV*  
907 mutants were slightly less virulent than WT, and *pilW*, *pilX*, and *pilY1* mutants were less virulent  
908 than all other strains tested. (B) SK assays for PAO1 *pilA*, *fimU*, *pilV*, *pilW*, *pilX*, *pilY1*, and *pilE*  
909 mutants. The PAO1 *pilE* mutant had similar virulence to WT, the *pilA* mutant was slightly less  
910 virulent, and *fimU*, *pilV*, *pilW*, *pilX*, and *pilY1* mutants were much less virulent. In (A) and (B),  
911 asterisks indicate strains that were significantly different from a *pilA* mutant by Gehan-Breslow-  
912 Wilcoxon test at  $p = 0.05$  ( $p = 0.00625$  with a Bonferroni correction),  $n = 3$  trials.

913

914 **Fig 2. *pilW*, *pilX*, and *pilY1* mutants have reduced *cdrA* promoter activity.**

915 (A) *cdrA* promoter activity in PA14 *sadC* and *algR* deletion and overexpression strains.  
916 pMS402-*PcdrA*, containing the *lux* genes under expression of the *cdrA* promoter, was introduced  
917 into strains of interest, along with pBADGr (vector-only control), pBADGr-*sadC*, or pBADGr-  
918 *algR*. Assays were set up in technical triplicate in SK media, with or without 0.05% L-arabinose  
919 to induce expression of the pBADGr promoter, and measurements were taken every 15 min over  
920 5 h. Loss of *sadC* or *algR* led to a subtle decrease in *cdrA* promoter activity, while SadC  
921 overexpression led to a dramatic increase in *cdrA* promoter activity. Overexpression of AlgR  
922 also led to a subtle increase in *cdrA* promoter activity that was enhanced upon addition of L-  
923 arabinose.  $n = 3$  trials. (B) *cdrA* promoter activity in PA14 *pilA*, *fimU*, *pilV*, *pilW*, *pilX*, *pilY1*,  
924 and *pilE* mutants. Loss of *pilW*, *pilX*, or *pilY1* led to a decrease in *cdrA* promoter activity.  $n = 3$   
925 trials.

926

927 **Figure 3. SadC promotes biofilm formation but is not required for virulence.**

928 (A) Biofilm assays for *sadC* deletion and overexpression strains. PA14 *sadC* biofilm levels were  
929 similar to WT. Expression of SadC *in trans* from a multicopy plasmid led to increased biofilm  
930 formation relative to WT at 0% (due to leaky promoter) and 0.05% L-arabinose,  $p < 0.001$ .  
931 Significance was determined by one-way ANOVA followed by Dunnett post-test relative to  
932 PA14 + pBADGr,  $n = 3$ . (B) SK assays for *sadC* deletion and overexpression strains.  
933 Overexpression of SadC led to a subtle but reproducible loss of virulence relative to WT at 0%  
934 L-arabinose. A *sadC* mutant had WT virulence. Asterisks indicate strains that were significantly  
935 different from PA14 + pBADGr by Gehan-Breslow-Wilcoxon test at  $p = 0.05$  ( $p = 0.0125$  with a  
936 Bonferroni correction),  $n = 3$ .

937

938 **Fig 4. PilVWXY1 repress their expression via FimS-AlgR.**

939 (A) BACTH assays for FimS, AlgR, PilA, and MPs. Protein fusions with T18 and T25 fragments  
940 of the CyaA adenylate cyclase were screened for interactions on MacConkey and LB + X-gal  
941 plates. FimS interacted with AlgR, PilA, FimU, PilV, PilW, PilX, and PilE. Positive (+) or  
942 negative (-) interactions are indicated below each image,  $n = 3$ . (B) *fimU* promoter activity in  
943 PA14 *pilA*, *fimU*, *pilV*, *pilW*, *pilX*, *pilY1*, *pilE*, *fimS*, *algR*, *pilY1 fimS*, or *pilY1 algR* mutants.  
944 pMS402-*PfimU*, containing the *fimU* promoter upstream of the *lux* genes, was introduced into  
945 strains of interest. Loss of *pilV*, *pilW*, *pilX*, or *pilY1* led to highly elevated *fimU* promoter  
946 activity. *pilA* and *fimU* mutants had moderately increased *fimU* promoter activity relative to WT.  
947 *fimS* and *algR* mutants had negligible luminescence, and loss of *fimS* or *algR* also reverted *fimU*  
948 promoter activity in the *pilY1* mutant to baseline.  $n = 3$  trials.

949

950 **Fig 5. AlgR hyperactivation reduces virulence.**

951 SK assays for (A) PA14 and (B) PAO1 *fimS*, *algR*, *algR<sub>D54A</sub>*, and *algR<sub>D54E</sub>* mutants. The *fimS*,  
952 *algR*, and *algR<sub>D54A</sub>* mutants had WT virulence, while the *algR<sub>D54E</sub>* mutants were less virulent  
953 than WT. For (A) and (B), asterisks indicate strains that were significantly different from WT by  
954 Gehan-Breslow-Wilcoxon test at  $p = 0.05$  ( $p = 0.01$  with a Bonferroni correction),  $n = 3$  trials.

955

956 **Fig 6. AlgR promotes biofilm formation and represses virulence.**

957 (A) SK assays for *algR* deletion and overexpression strains. Loss of *algR* led to a small increase  
958 in virulence, while overexpression of pBADGr-*algR* or pBADGr-*algR<sub>D54A</sub>* reduced virulence at  
959 0.05% L-arabinose. Asterisks indicate strains that were significantly different from PA14 +  
960 pBADGr by Gehan-Breslow-Wilcoxon test at  $p = 0.05$  ( $p = 0.00833$  with a Bonferroni  
961 correction),  $n = 3$  trials. (B) Biofilm assays for *algR* deletion and overexpression strains.  
962 Microtiter plate biofilm assays were performed in liquid SK media over 24 h, in triplicate.  
963 Biofilms were stained with 1% crystal violet then solubilized in acetic acid. Loss of *algR* had no  
964 effect on biofilm formation. When grown at 0.05% L-arabinose, overexpression of pBADGr-  
965 *algR* or pBADGr-*algR<sub>D54A</sub>* increased biofilm formation,  $p < 0.001$ . Significance was determined  
966 by one-way ANOVA followed by Dunnett post-test relative to WT,  $n = 3$  trials.

967

968 **Fig 7. The virulence defect of *pilW*, *pilX*, and *pilY1* mutants is dependent on FimS-AlgR.**

969 SK assays for *pilW*, *pilX*, *pilY1*, *fimS*, *algR*, and *algR<sub>D54A</sub>* single and double mutants. *fimS*, *algR*,  
970 and *algR<sub>D54A</sub>* mutants have WT virulence. *pilW*, *pilX*, and *pilY1* have reduced virulence relative  
971 to WT, *fimS*, *algR*, and *algR<sub>D54A</sub>* mutants. Combination of *pilW*, *pilX*, or *pilY1* mutations with  
972 *fimS*, *algR*, or *algR<sub>D54A</sub>* mutations results in virulence equivalent to *fimS*, *algR*, and *algR<sub>D54A</sub>*  
973 single mutants, respectively. All graphs represent 1 trial, separated into 3 graphs where strains

974 relevant to (A) *pilW*, (B) *pilX*, and (C) *pilY1* mutants are included. Asterisks indicate strains that  
975 were less virulent than PA14 by Gehan-Breslow-Wilcoxon test at  $p = 0.05$  ( $p = 0.003125$  with a  
976 Bonferroni correction),  $n = 3$ .

977

978 **Fig 8. PilWXY1-mediated virulence is not dependent on AlgU.**

979 SK assays for PA14 *pilW*, *pilX*, *pilY1*, *algU*, *pilW algU*, *pilX algU*, and *pilY1 algU* mutants. Loss  
980 of *algU* led to increased pathogenicity relative to WT, while *pilW algU*, *pilX algU*, and *pilY1*  
981 *algU* mutants had near-WT virulence. Asterisks indicate strains that were significantly different  
982 from PA14 by Gehan-Breslow-Wilcoxon test at  $p = 0.05$  ( $p = 0.00625$  with a Bonferroni  
983 correction),  $n = 3$ .

984

985 **Fig 9. Hypothesized model for regulation of the MP operon via FimS-AlgR.**

986 When PilVWXY1 are absent, FimS may directly or indirectly promote increased protein levels  
987 and/or phosphorylation of AlgR (phosphate indicated by yellow star). Phospho-AlgR binds the  
988 *fimU* promoter to promote expression of *pilY1* and the MP genes. Phospho-AlgR also promotes  
989 expression of genes associated with chronic infections, and represses those associated with acute  
990 infections. As PilVWXY1 accumulate in the IM, they are likely detected by FimS, potentially  
991 leading to reduced AlgR protein levels and/or phosphorylation. Abbreviations: PilV, V (orange);  
992 PilW, W (cyan); PilX, X (pink); PilY1, Y1 (dark purple); IM, inner membrane.

993

994 **Supporting information**

995 **Fig S1. Twitching motility and virulence of *pilW*, *pilX*, and *pilY1* mutants can be**  
996 **complemented *in trans*.**

997 (A) Twitching motility assays for complemented PA14 *pilW*, *pilX*, and *pilY1* mutants. Colonies  
998 were stab-inoculated into 1% agar LB plates, in triplicate. Plates were stained with crystal violet  
999 after 48 h at 30°C. Complementation of PA14 *pilW*, *pilX*, and *pilY1* mutants with pBADGr-*pilW*,  
1000 pBADGr-*pilX*, or pBADGr-*pilY1*, respectively, led to increased TM relative to complementation  
1001 with pBADGr alone. Numbers indicate percent twitching area relative to WT, n = 3. (B) SK  
1002 assays for complemented PA14 *pilW*, *pilX*, and *pilY1* mutants. Complementation of *pilW*, *pilX*,  
1003 and *pilY1* mutants with pBADGr-*pilW*, pBADGr-*pilX*, or pBADGr-*pilY1*, respectively, restored  
1004 virulence to near-WT levels. Asterisks indicate strains that were less virulent than PA14 +  
1005 pBADGr by Gehan-Breslow-Wilcoxon test at p = 0.05 (p = 0.00833 with a Bonferroni  
1006 correction), n = 3. Individual graphs represent separate trials.

1007

1008 **Fig S2. PA14 and PAO1 produce low levels of biofilm in liquid slow killing media.**

1009 Biofilm assays for (A) PA14 and (B) PAO1 *pilA*, *fimU*, *pilV*, *pilW*, *pilX*, *pilY1*, and *pilE* mutants.  
1010 Very little biofilm formation was detectable in liquid SK media for any strains. There were no  
1011 differences in biofilm formation as determined by one-way ANOVA followed by Dunnett post-  
1012 test relative to WT at p = 0.05, n = 3.

1013

1014 **Fig S3. SadC is not required for virulence in PA14 or PAO1.**

1015 SK assays for (A) PA14 and (B) PAO1 *sadC* mutants. Loss of *sadC* had no impact on  
1016 pathogenicity relative to each respective WT strain, as measured by Gehan-Breslow-Wilcoxon  
1017 test at p = 0.05 (p = 0.025 with a Bonferroni correction), n = 3.

1018

1019 **Fig S4. *pilV*, *pilW*, *pilX*, and *pilY1* mutants cannot be cross-complemented for *fimU***  
1020 **promoter activity.**

1021 (A) *fimU* promoter activity of *pilV*, *pilW*, *pilX*, and *pilY1* mutants complemented with the  
1022 respective gene *in trans*. The high luminescence of each mutant was restored to WT level when  
1023 *pilV*, *pilW*, *pilX*, and *pilY1* were complemented with PilV, PilW, PilX, and PilY1, respectively.  
1024 (B) *fimU* promoter activity of a *pilY1* mutant expressing each MP *in trans*. Expression of FimU,  
1025 PilV, PilW, PilX, or PilE in the *pilY1* background had no impact on *fimU* promoter activity  
1026 relative to the *pilY1* + empty vector control. (C) *fimU* promoter activity of *pilW* and *pilX* mutants  
1027 overexpressing PilY1. Overexpression of PilY1 had no impact on *fimU* promoter activity in *pilW*  
1028 and *pilX* backgrounds relative to the respective vector-only controls. Assays in (A), (B), and (C)  
1029 were carried out in the presence of 0.05% L-arabinose to induce expression of the pBADGr  
1030 promoter, n = 3.

1031

1032 **Fig S5. PilD is not required for PilWXY1-mediated modulation of FimS-AlgR activity.**

1033 (A) Twitching motility assays for PA14 *pilA* and *pilD* mutants. Loss of *pilD* resulted in loss of  
1034 twitching motility. Numbers indicate percent twitching area relative to WT, n = 3. (B) *fimU*  
1035 promoter activity of a *pilD* mutant compared to PA14, *pilA*, and *pilY1*. Loss of *pilD* had no  
1036 impact on *fimU* promoter activity relative to WT, n = 3. (C) SK assays for PA14, *pilA*, *pilY1*, and  
1037 *pilD* mutants. A *pilD* mutant had equivalent virulence to a *pilA* mutant; less pathogenic than WT  
1038 but more pathogenic than a *pilY1* mutants. Asterisks represent strains that were significantly  
1039 different from the *pilA* mutant by Gehan-Breslow-Wilcoxon test at p = 0.05 (p = 0.0125 with a  
1040 Bonferroni correction), n = 3.

1041

1042 **Fig S6. Phosphorylation of AlgR is required for optimal twitching motility.**

1043 (A) Twitching motility assays for PA14 *pilA*, *fimS*, *algR*, *algR<sub>D54A</sub>*, and *algR<sub>D54E</sub>* mutants.

1044 Twitching motility was abolished in *pilA*, *algR*, and *algR<sub>D54A</sub>* mutants, and fully retained in the

1045 *algR<sub>D54E</sub>* mutant. A *fimS* mutant twitched to ~50% WT levels. (B) Twitching motility assays for

1046 PA14 *algR* complemented with AlgR or AlgR<sub>D54A</sub>. An *algR* mutant was fully complemented by

1047 AlgR with and without induction by 0.05% L-arabinose. The AlgR<sub>D54A</sub> variant supported

1048 twitching motility in the *algR* mutant background in the presence of 0.05% L-arabinose, to ~25%

1049 WT levels. In (A) and (B), numbers indicate percent twitching area relative to WT, n = 3.

1050

1051 **Table S1. Bacterial strains and plasmids used in this study.**

1052

1053 **Table S2. Primers used in this study.** Restriction sites are underlined.

1054

1055 **File S1. Replicates for slow killing assays.** Three independent experiments for Figs 1A-B, 3B,

1056 5A-B, 6A, 7A-C, 8, and Supplementary Figs S1B, S3A-B, S5C.

1057





A

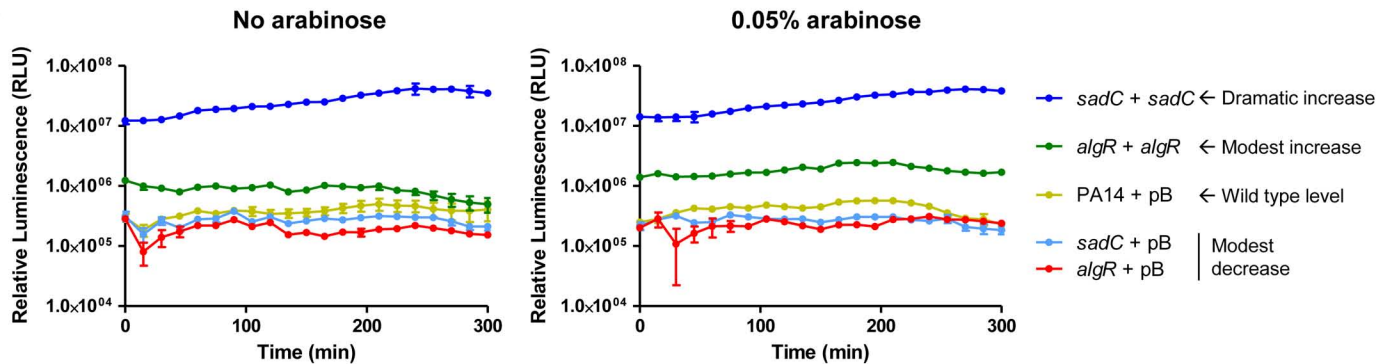

B

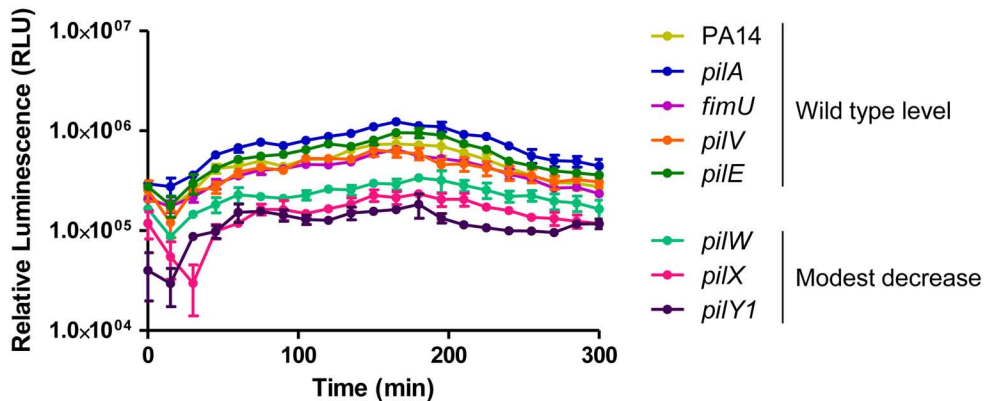

A

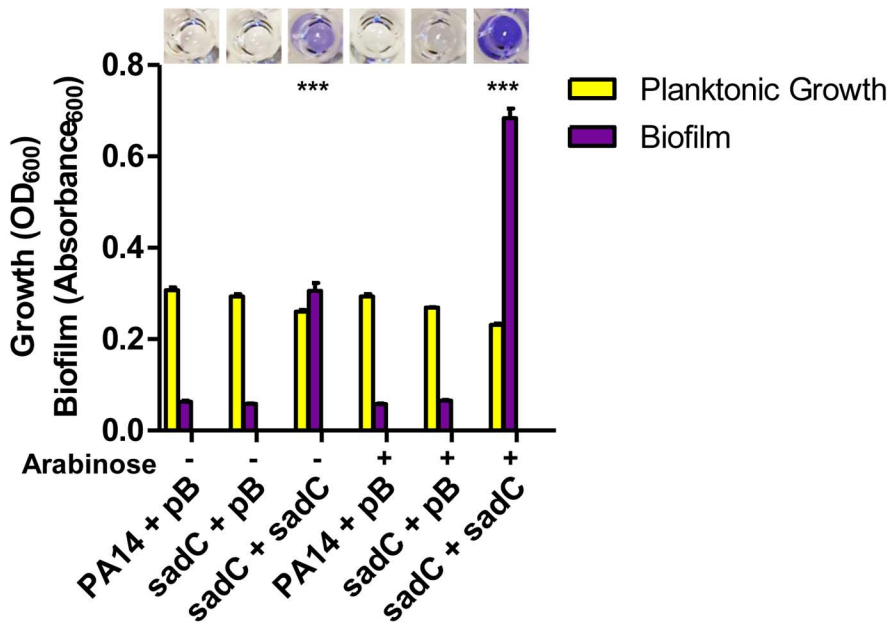

B

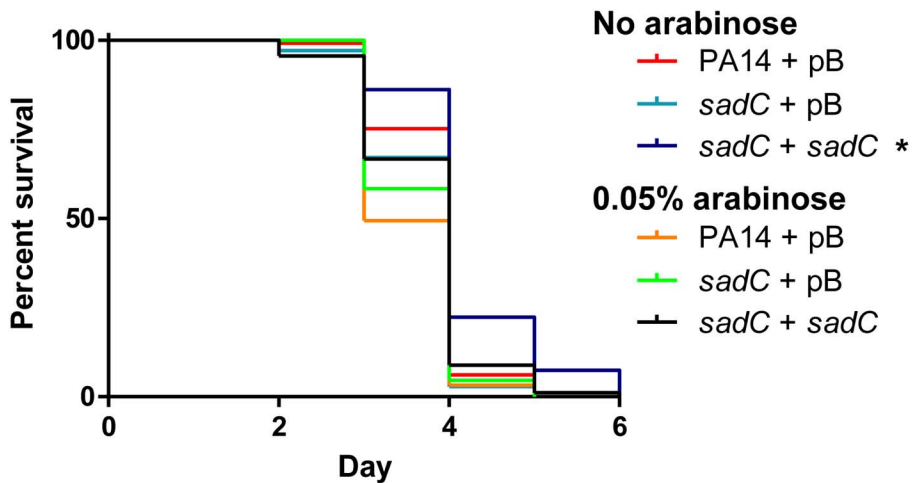

**A**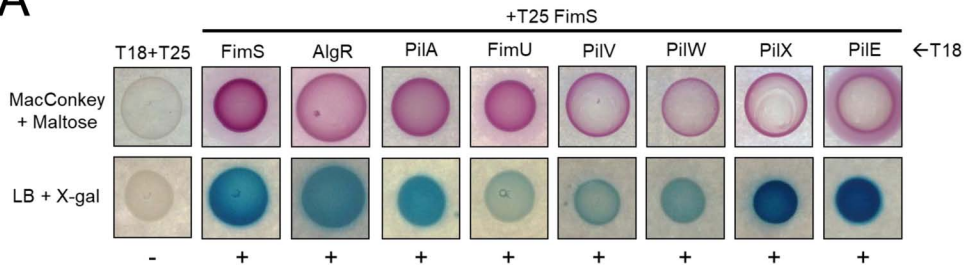**B**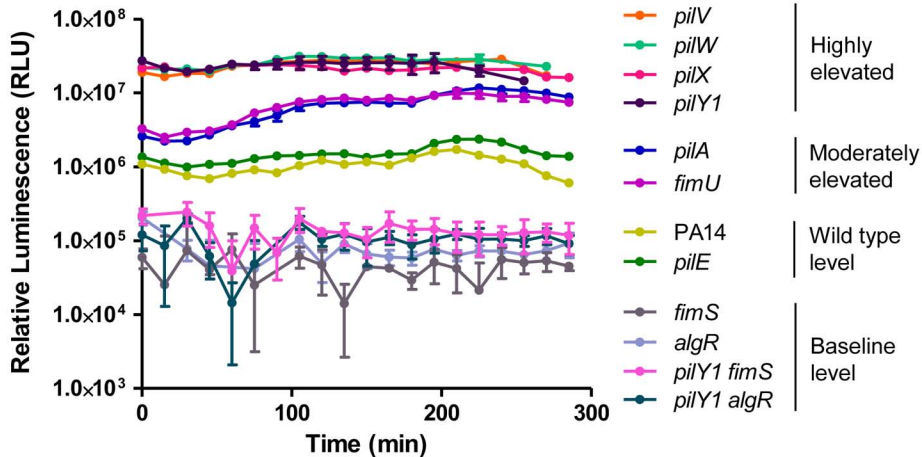

**A**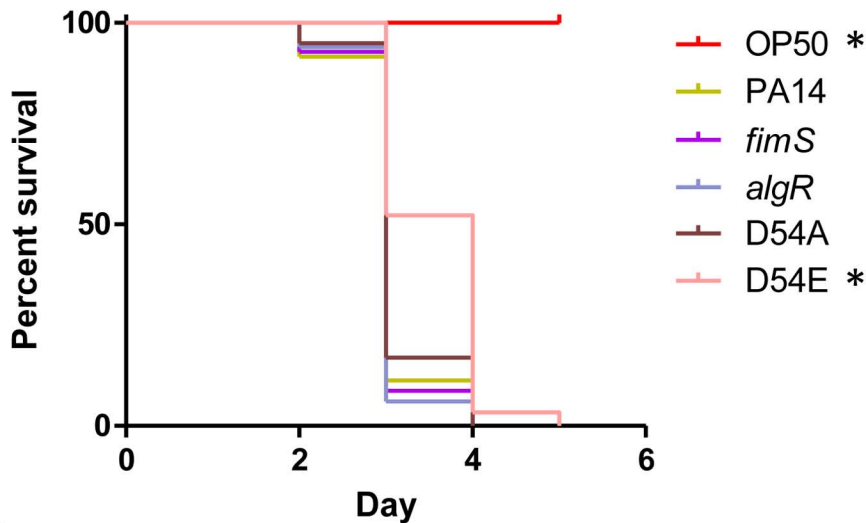**B**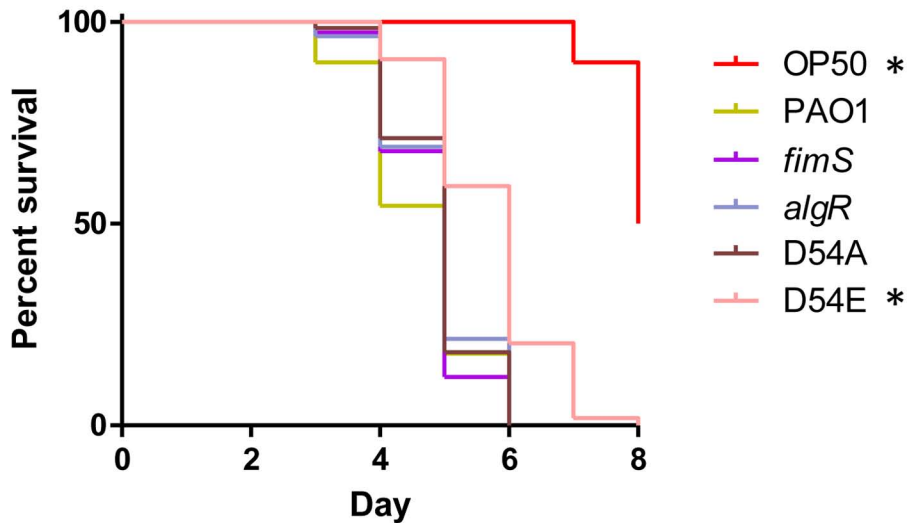

A

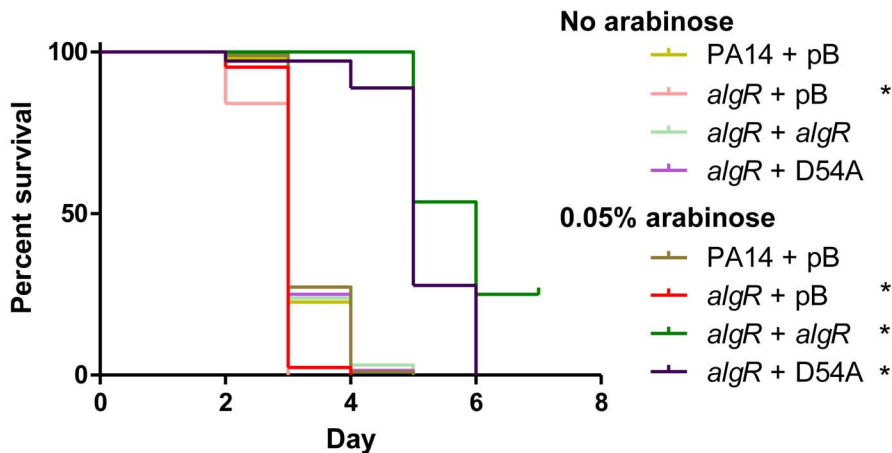

B

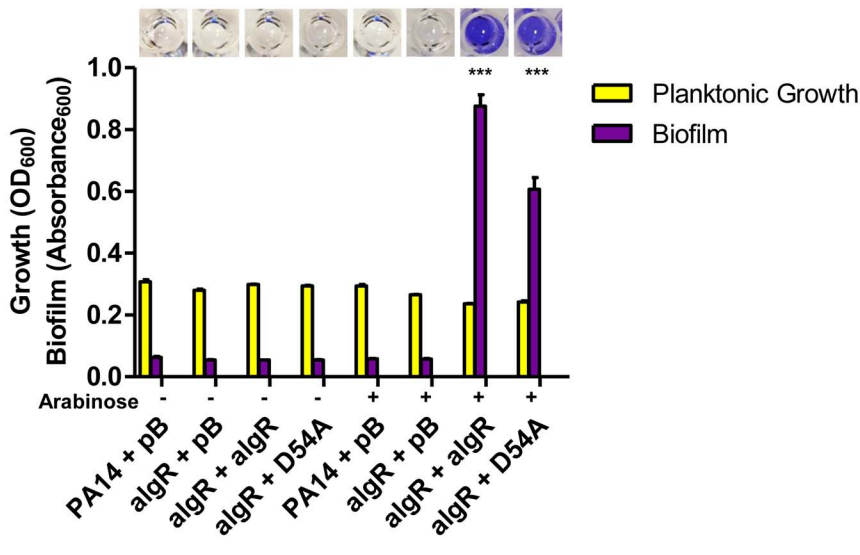

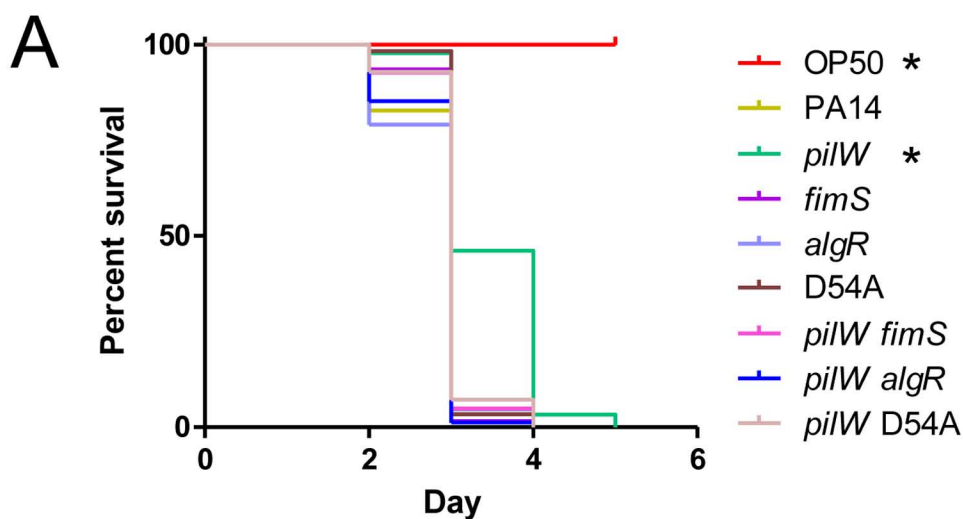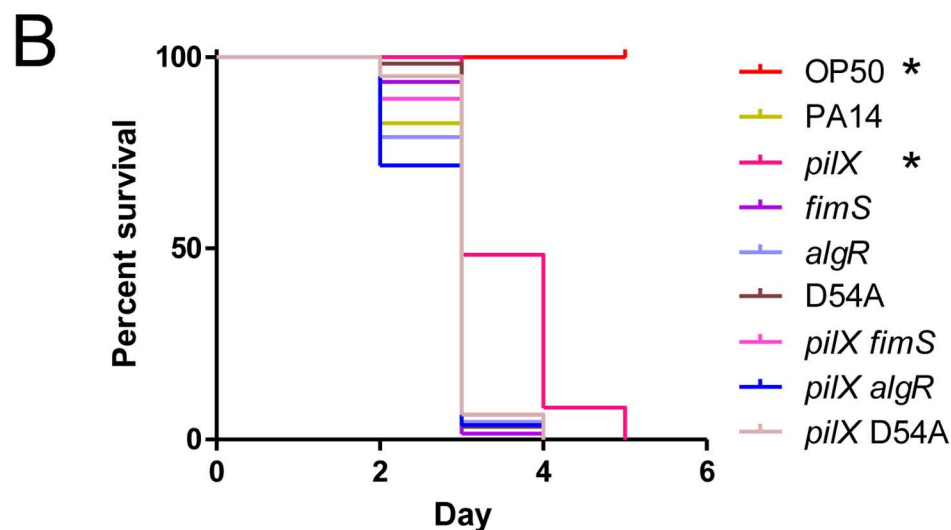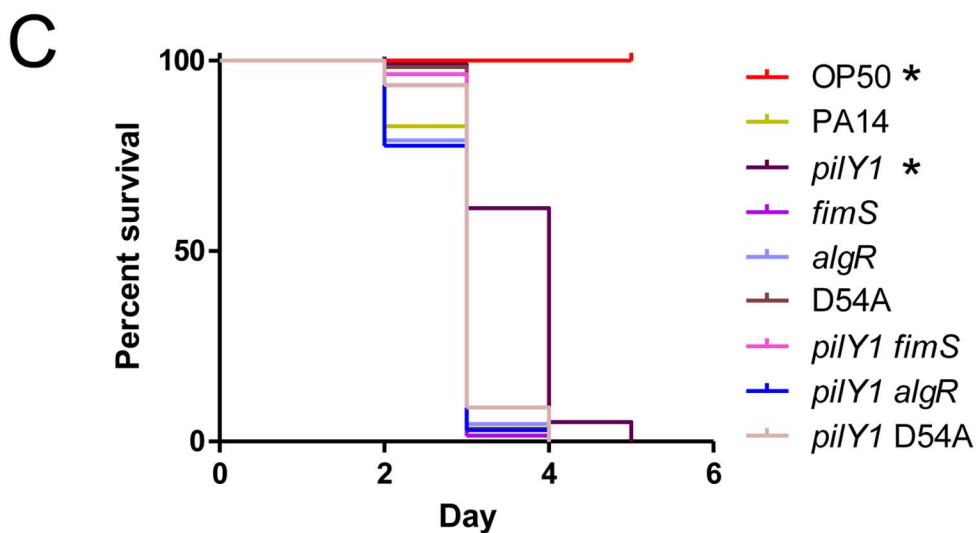

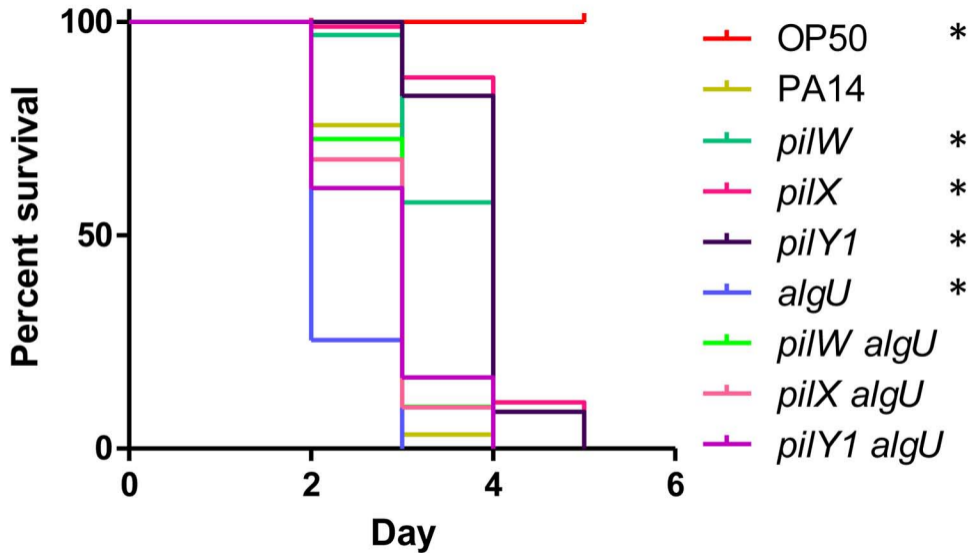

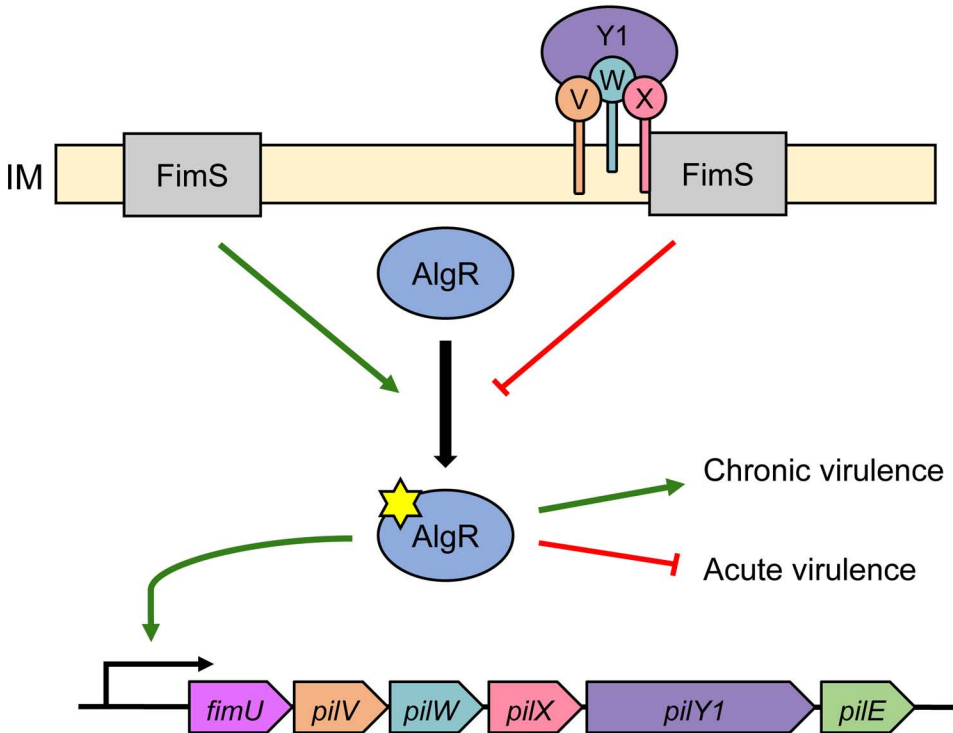



**Table S1. Bacterial strains and plasmids used in this study.**

| Strain/Plasmid                       | Characteristics                                                                                                                                                                                                 | Source     |
|--------------------------------------|-----------------------------------------------------------------------------------------------------------------------------------------------------------------------------------------------------------------|------------|
| <b>Plasmids</b>                      |                                                                                                                                                                                                                 |            |
| pEX18Gm                              | Suicide vector for gene replacement                                                                                                                                                                             | [1]        |
| pEX18Gm- <i>pilA</i>                 | Deletion construct for PA14 <i>pilA</i>                                                                                                                                                                         | This work  |
| pEX18Gm- <i>fimU</i>                 | Deletion construct for PA14 <i>fimU</i>                                                                                                                                                                         | This work  |
| pEX18Gm- <i>pilV</i>                 | Deletion construct for PA14 <i>pilV</i>                                                                                                                                                                         | This work  |
| pEX18Gm- <i>pilW</i>                 | Deletion construct for PA14 <i>pilW</i>                                                                                                                                                                         | This work  |
| pEX18Gm- <i>pilX</i>                 | Deletion construct for PA14 <i>pilX</i>                                                                                                                                                                         | This work  |
| pEX18Gm- <i>pilY1</i>                | Deletion construct for PA14 <i>pilY1</i>                                                                                                                                                                        | This work  |
| pEX18Gm- <i>pilE</i>                 | Deletion construct for PA14 <i>pilE</i>                                                                                                                                                                         | This work  |
| pEX18Gm- <i>sadC</i>                 | Deletion construct for <i>sadC</i>                                                                                                                                                                              | This work  |
| pEX18Gm- <i>fimS</i>                 | Deletion construct for <i>fimS</i>                                                                                                                                                                              | This work  |
| pEX18Gm- <i>algR</i>                 | Deletion construct for <i>algR</i>                                                                                                                                                                              | This work  |
| pEX18Gm- <i>algR</i> <sub>D54A</sub> | Mating construct for <i>algR</i> D54A substitution                                                                                                                                                              | This work  |
| pEX18Gm- <i>algR</i> <sub>D54E</sub> | Mating construct for <i>algR</i> D54E substitution                                                                                                                                                              | This work  |
| pEX18Gm- <i>algU</i>                 | Deletion construct for <i>algU</i>                                                                                                                                                                              | This work  |
| pEX18Gm- <i>pilD</i>                 | Deletion construct for <i>pilD</i>                                                                                                                                                                              | This work  |
| pBADGr                               | Arabinose-inducible complementation vector                                                                                                                                                                      | [2]        |
| pBADGr- <i>pilW</i>                  | Complementation construct for <i>pilW</i>                                                                                                                                                                       | [3]        |
| pBADGr- <i>pilX</i>                  | Complementation construct for <i>pilX</i>                                                                                                                                                                       | This work  |
| pBADGr- <i>pilY1</i>                 | Complementation construct for <i>pilY1</i>                                                                                                                                                                      | This work  |
| pBADGr- <i>sadC</i>                  | Complementation construct for <i>sadC</i>                                                                                                                                                                       | This work  |
| pBADGr- <i>algR</i>                  | Complementation construct for <i>algR</i>                                                                                                                                                                       | This work  |
| pBADGr- <i>algR</i> <sub>D54A</sub>  | Complementation construct for <i>algR</i> <sub>D54A</sub>                                                                                                                                                       | This work  |
| pMS402                               | Transcriptional reporter vector carrying the promoterless <i>luxCDABE</i> genes                                                                                                                                 | [4]        |
| pMS402-P <i>fimU</i>                 | Transcriptional reporter for <i>fimU</i> promoter                                                                                                                                                               | This work  |
| pMS402-P <i>cdrA</i>                 | Transcriptional reporter for <i>cdrA</i> promoter                                                                                                                                                               | This work  |
| pKT25                                | Vector encoding T25 fragment of <i>B. pertussis</i> CyaA                                                                                                                                                        | [5]        |
| pKT25- <i>fimS</i>                   | Vector encoding <i>fimS</i> fused to T25                                                                                                                                                                        | This work  |
| pUT18C                               | Vector encoding T18 fragment of <i>B. pertussis</i> CyaA                                                                                                                                                        | [6]        |
| pUT18C- <i>fimS</i>                  | Vector encoding <i>fimS</i> fused to T18                                                                                                                                                                        | [7]        |
| pUT18C- <i>algR</i>                  | Vector encoding <i>algR</i> fused to T18                                                                                                                                                                        | This work  |
| pUT18C- <i>pilA</i>                  | Vector encoding <i>pilA</i> fused to T18                                                                                                                                                                        | This work  |
| pUT18C- <i>fimU</i>                  | Vector encoding <i>fimU</i> fused to T18                                                                                                                                                                        | [8]        |
| pUT18C- <i>pilV</i>                  | Vector encoding <i>pilV</i> fused to T18                                                                                                                                                                        | This work  |
| pUT18C- <i>pilW</i>                  | Vector encoding <i>pilW</i> fused to T18                                                                                                                                                                        | This work  |
| pUT18C- <i>pilX</i>                  | Vector encoding <i>pilX</i> fused to T18                                                                                                                                                                        | This work  |
| pUT18C- <i>pilE</i>                  | Vector encoding <i>pilE</i> fused to T18                                                                                                                                                                        | [9]        |
| <b><i>E. coli</i> strains</b>        |                                                                                                                                                                                                                 |            |
| DH5 $\alpha$                         | <i>F</i> $\phi$ 80 <i>lacZ</i> $\Delta$ M15 $\Delta$ ( <i>lacZYA-argF</i> )U169 <i>recA1 endA1 hsdR17</i> ( <i>rk</i> <sup>-</sup> , <i>mk</i> <sup>+</sup> ) <i>phoA supE44 thi-1 gyrA96 relA1</i> $\lambda$ - | Invitrogen |

|                                                   |                                                                                                       |            |
|---------------------------------------------------|-------------------------------------------------------------------------------------------------------|------------|
| SM10                                              | <i>thi-1 thr leu tonA lacY supE recA::RP4-2-Tc::Mu (Km<sup>R</sup>)</i>                               | Invitrogen |
| OP50                                              | <i>Uracil auxotroph, C. elegans food source</i>                                                       | [10]       |
| BTH 101                                           | <i>Bacterial two-hybrid reporter strain</i>                                                           | Euromedex  |
| <b><i>P. aeruginosa</i> strains</b>               |                                                                                                       |            |
| PAO1                                              | WT                                                                                                    | [11]       |
| PAO1 <i>pilA</i>                                  | ISphoA/hah transposon insertion at position 163                                                       | [11]       |
| PAO1 <i>fimU</i>                                  | ISlacZ/hah transposon insertion at position 237                                                       | [11]       |
| PAO1 <i>pilV</i>                                  | ISphoA/hah transposon insertion at position 122                                                       | [11]       |
| PAO1 <i>pilW</i>                                  | ISlacZ/hah transposon insertion at position 381                                                       | [11]       |
| PAO1 <i>pilX</i>                                  | ISphoA/hah transposon insertion at position 182                                                       | [11]       |
| PAO1 <i>pilY1</i>                                 | ISlacZ/hah transposon insertion at position 1407                                                      | [11]       |
| PAO1 <i>pilE</i>                                  | ISphoA/hah transposon insertion at position 183                                                       | [11]       |
| PAO1 <i>sadC</i>                                  | Deletion of <i>sadC</i>                                                                               | This work  |
| PAO1 <i>fimS</i>                                  | Deletion of <i>fimS</i>                                                                               | This work  |
| PAO1 <i>algR</i>                                  | Deletion of <i>algR</i>                                                                               | This work  |
| PAO1 <i>algR</i> <sub>D54A</sub>                  | PAO1 expressing the phospho-inactive form of <i>algR</i>                                              | This work  |
| PAO1 <i>algR</i> <sub>D54E</sub>                  | PAO1 expressing the phospho-mimetic form of <i>algR</i>                                               | This work  |
| PA14                                              | WT                                                                                                    | [12]       |
| PA14 + pBADGr                                     | WT with pBADGr                                                                                        | This work  |
| PA14 + pMS402- <i>PfimU</i>                       | WT with pMS402 containing <i>fimU</i> promoter                                                        | This work  |
| PA14 + pMS402- <i>PfimU</i> + pBADGr              | WT with pMS402 containing <i>fimU</i> promoter and pBADGr                                             | This work  |
| PA14 + pMS402- <i>PcdrA</i>                       | WT with pMS402 containing <i>cdrA</i> promoter                                                        | This work  |
| PA14 + pMS402- <i>PcdrA</i> + pBADGr              | WT with pMS402 containing <i>cdrA</i> promoter and pBADGr                                             | This work  |
| PA14 <i>pilA</i>                                  | Deletion of <i>pilA</i>                                                                               | This work  |
| PA14 <i>pilA</i> + pMS402- <i>PfimU</i>           | Deletion of <i>pilA</i> with pMS402 containing <i>fimU</i> promoter                                   | This work  |
| PA14 <i>pilA</i> + pMS402- <i>PcdrA</i>           | Deletion of <i>pilA</i> with pMS402 containing <i>cdrA</i> promoter                                   | This work  |
| PA14 <i>fimU</i>                                  | Deletion of <i>fimU</i>                                                                               | This work  |
| PA14 <i>fimU</i> + pMS402- <i>PfimU</i>           | Deletion of <i>fimU</i> with pMS402 containing <i>fimU</i> promoter                                   | This work  |
| PA14 <i>fimU</i> + pMS402- <i>PcdrA</i>           | Deletion of <i>fimU</i> with pMS402 containing <i>cdrA</i> promoter                                   | This work  |
| PA14 <i>pilV</i>                                  | Deletion of <i>pilV</i>                                                                               | This work  |
| PA14 <i>pilV</i> + pMS402- <i>PfimU</i>           | Deletion of <i>pilV</i> with pMS402 containing <i>fimU</i> promoter                                   | This work  |
| PA14 <i>pilV</i> + pMS402- <i>PfimU</i> + pBADGr  | Deletion of <i>pilV</i> with pMS402 containing <i>fimU</i> promoter and pBADGr                        | This work  |
| PA14 <i>pilV</i> + pMS402- <i>PfimU</i> + pBADGr- | Deletion of <i>pilV</i> with pMS402 containing <i>fimU</i> promoter and complemented with <i>pilV</i> | This work  |

|                                                                |                                                                                                        |           |
|----------------------------------------------------------------|--------------------------------------------------------------------------------------------------------|-----------|
| <i>pilV</i>                                                    |                                                                                                        |           |
| PA14 <i>pilV</i> + pMS402- <i>PcdrA</i>                        | Deletion of <i>pilV</i> with pMS402 containing <i>cdrA</i> promoter                                    | This work |
| PA14 <i>pilW</i>                                               | Deletion of <i>pilW</i>                                                                                | This work |
| PA14 <i>pilW</i> + pBADGr                                      | Deletion of <i>pilW</i> containing pBADGr                                                              | This work |
| PA14 <i>pilW</i> + pBADGr- <i>pilW</i>                         | Deletion of <i>pilW</i> complemented with <i>pilW</i>                                                  | This work |
| PA14 <i>pilW</i> + pMS402- <i>PfimU</i>                        | Deletion of <i>pilW</i> with pMS402 containing <i>fimU</i> promoter                                    | This work |
| PA14 <i>pilW</i> + pMS402- <i>PfimU</i> + pBADGr               | Deletion of <i>pilW</i> with pMS402 containing <i>fimU</i> promoter and pBADGr                         | This work |
| PA14 <i>pilW</i> + pMS402- <i>PfimU</i> + pBADGr- <i>pilW</i>  | Deletion of <i>pilW</i> with pMS402 containing <i>fimU</i> promoter and complemented with <i>pilW</i>  | This work |
| PA14 <i>pilW</i> + pMS402- <i>PfimU</i> + pBADGr- <i>pilY1</i> | Deletion of <i>pilW</i> with pMS402 containing <i>fimU</i> promoter and complemented with <i>pilY1</i> | This work |
| PA14 <i>pilW</i> + pMS402- <i>PcdrA</i>                        | Deletion of <i>pilW</i> with pMS402 containing <i>cdrA</i> promoter                                    | This work |
| PA14 <i>pilX</i>                                               | Deletion of <i>pilX</i>                                                                                | This work |
| PA14 <i>pilX</i> + pBADGr                                      | Deletion of <i>pilX</i> containing pBADGr                                                              | This work |
| PA14 <i>pilX</i> + pBADGr- <i>pilX</i>                         | Deletion of <i>pilX</i> complemented with <i>pilX</i>                                                  | This work |
| PA14 <i>pilX</i> + pMS402- <i>PfimU</i>                        | Deletion of <i>pilX</i> with pMS402 containing <i>fimU</i> promoter                                    | This work |
| PA14 <i>pilX</i> + pMS402- <i>PfimU</i> + pBADGr               | Deletion of <i>pilX</i> with pMS402 containing <i>fimU</i> promoter and pBADGr                         | This work |
| PA14 <i>pilX</i> + pMS402- <i>PfimU</i> + pBADGr- <i>pilX</i>  | Deletion of <i>pilX</i> with pMS402 containing <i>fimU</i> promoter and complemented with <i>pilX</i>  | This work |
| PA14 <i>pilX</i> + pMS402- <i>PfimU</i> + pBADGr- <i>pilY1</i> | Deletion of <i>pilX</i> with pMS402 containing <i>fimU</i> promoter and complemented with <i>pilY1</i> | This work |
| PA14 <i>pilX</i> + pMS402- <i>PcdrA</i>                        | Deletion of <i>pilX</i> with pMS402 containing <i>cdrA</i> promoter                                    | This work |
| PA14 <i>pilY1</i>                                              | Deletion of <i>pilY1</i>                                                                               | This work |
| PA14 <i>pilY1</i> + pBADGr                                     | Deletion of <i>pilY1</i> containing pBADGr                                                             | This work |
| PA14 <i>pilY1</i> + pBADGr- <i>pilY1</i>                       | Deletion of <i>pilY1</i> complemented with <i>pilY1</i>                                                | This work |
| PA14 <i>pilY1</i> + pMS402- <i>PfimU</i>                       | Deletion of <i>pilY1</i> with pMS402 containing <i>fimU</i> promoter                                   | This work |
| PA14 <i>pilY1</i> + pMS402- <i>PfimU</i> +                     | Deletion of <i>pilY1</i> with pMS402 containing <i>fimU</i> promoter and pBADGr                        | This work |

|                                                                 |                                                                                                         |           |
|-----------------------------------------------------------------|---------------------------------------------------------------------------------------------------------|-----------|
| pBADGr                                                          |                                                                                                         |           |
| PA14 <i>pilY1</i> + pMS402- <i>PfimU</i> + pBADGr- <i>pilY1</i> | Deletion of <i>pilY1</i> with pMS402 containing <i>fimU</i> promoter and complemented with <i>pilY1</i> | This work |
| PA14 <i>pilY1</i> + pMS402- <i>PfimU</i> + pBADGr- <i>fimU</i>  | Deletion of <i>pilY1</i> with pMS402 containing <i>fimU</i> promoter and complemented with <i>fimU</i>  | This work |
| PA14 <i>pilY1</i> + pMS402- <i>PfimU</i> + pBADGr- <i>pilV</i>  | Deletion of <i>pilY1</i> with pMS402 containing <i>fimU</i> promoter and complemented with <i>pilV</i>  | This work |
| PA14 <i>pilY1</i> + pMS402- <i>PfimU</i> + pBADGr- <i>pilW</i>  | Deletion of <i>pilY1</i> with pMS402 containing <i>fimU</i> promoter and complemented with <i>pilW</i>  | This work |
| PA14 <i>pilY1</i> + pMS402- <i>PfimU</i> + pBADGr- <i>pilX</i>  | Deletion of <i>pilY1</i> with pMS402 containing <i>fimU</i> promoter and complemented with <i>pilX</i>  | This work |
| PA14 <i>pilY1</i> + pMS402- <i>PfimU</i> + pBADGr- <i>pilE</i>  | Deletion of <i>pilY1</i> with pMS402 containing <i>fimU</i> promoter and complemented with <i>pilE</i>  | This work |
| PA14 <i>pilY1</i> + pMS402- <i>PcdrA</i>                        | Deletion of <i>pilY1</i> with pMS402 containing <i>cdrA</i> promoter                                    | This work |
| PA14 <i>pilE</i>                                                | Deletion of <i>pilE</i>                                                                                 | This work |
| PA14 <i>pilE</i> + pMS402- <i>PfimU</i>                         | Deletion of <i>pilE</i> with pMS402 containing <i>fimU</i> promoter                                     | This work |
| PA14 <i>pilE</i> + pMS402- <i>PcdrA</i>                         | Deletion of <i>pilE</i> with pMS402 containing <i>cdrA</i> promoter                                     | This work |
| PA14 <i>sadC roeA</i>                                           | Deletion of <i>sadC</i> and <i>roeA</i>                                                                 | [13]      |
| PA14 <i>sadC</i>                                                | Deletion of <i>sadC</i>                                                                                 | This work |
| PA14 <i>sadC</i> + pBADGr                                       | Deletion of <i>sadC</i> with pBADGr                                                                     | This work |
| PA14 <i>sadC</i> + pMS402- <i>PcdrA</i> + pBADGr                | Deletion of <i>sadC</i> with pMS402 containing <i>cdrA</i> promoter and pBADGr                          | This work |
| PA14 <i>sadC</i> + pBADGr- <i>sadC</i>                          | Deletion of <i>sadC</i> complemented with <i>sadC</i>                                                   | This work |
| PA14 <i>sadC</i> + pMS402- <i>PcdrA</i> + pBADGr- <i>sadC</i>   | Deletion of <i>sadC</i> with pMS402 containing <i>cdrA</i> promoter and complemented with <i>sadC</i>   | This work |
| PA14 <i>fimS</i>                                                | Deletion of <i>fimS</i>                                                                                 | This work |
| PA14 <i>fimS</i> + pMS402- <i>PfimU</i>                         | Deletion of <i>fimS</i> with pMS402 containing <i>fimU</i> promoter                                     | This work |
| PA14 <i>algR</i>                                                | Deletion of <i>algR</i>                                                                                 | This work |
| PA14 <i>algR</i> + pBADGr                                       | Deletion of <i>algR</i> with pBADGr                                                                     | This work |
| PA14 <i>algR</i> + pMS402- <i>PcdrA</i> +                       | Deletion of <i>algR</i> with pMS402 containing <i>cdrA</i> promoter and PA14                            | This work |

|                                                               |                                                                                                       |           |
|---------------------------------------------------------------|-------------------------------------------------------------------------------------------------------|-----------|
| pBADGr                                                        |                                                                                                       |           |
| PA14 <i>algR</i> + pBADGr- <i>algR</i>                        | Deletion of <i>algR</i> complemented with WT <i>algR</i>                                              | This work |
| PA14 <i>algR</i> + pMS402-P <i>cdrA</i> + pBADGr- <i>algR</i> | Deletion of <i>algR</i> with pMS402 containing <i>cdrA</i> promoter and complemented with <i>algR</i> | This work |
| PA14 <i>algR</i> + pBADGr- <i>algR</i> <sub>D54A</sub>        | Deletion of <i>algR</i> complemented with phospho-inactive <i>algR</i>                                | This work |
| PA14 <i>algR</i> + pMS402-P <i>fimU</i>                       | Deletion of <i>algR</i> with pMS402 containing <i>fimU</i> promoter                                   | This work |
| PA14 <i>algR</i> <sub>D54A</sub>                              | PA14 expressing the phospho-inactive form of <i>algR</i>                                              | This work |
| PA14 <i>algR</i> <sub>D54E</sub>                              | PA14 expressing the phospho-mimetic form of <i>algR</i>                                               | This work |
| PA14 <i>algU</i>                                              | Deletion of <i>algU</i>                                                                               | This work |
| PA14 <i>pilD</i>                                              | Deletion of <i>pilD</i>                                                                               | This work |
| PA14 <i>pilW fimS</i>                                         | Deletion of <i>fimS</i> in <i>pilW</i> background                                                     | This work |
| PA14 <i>pilW algR</i>                                         | Deletion of <i>algR</i> in <i>pilW</i> background                                                     | This work |
| PA14 <i>pilW algR</i> <sub>D54A</sub>                         | Deletion of <i>pilW</i> in phospho-inactive <i>algR</i> background                                    | This work |
| PA14 <i>pilW algU</i>                                         | Deletion of <i>algU</i> in <i>pilW</i> background                                                     | This work |
| PA14 <i>pilX fimS</i>                                         | Deletion of <i>fimS</i> in <i>pilX</i> background                                                     | This work |
| PA14 <i>pilX algR</i>                                         | Deletion of <i>algR</i> in <i>pilX</i> background                                                     | This work |
| PA14 <i>pilX algR</i> <sub>D54A</sub>                         | Deletion of <i>pilX</i> deletion in phospho-inactive <i>algR</i> background                           | This work |
| PA14 <i>pilX algU</i>                                         | Deletion of <i>algU</i> in <i>pilX</i> background                                                     | This work |
| PA14 <i>pilY1 fimS</i>                                        | Deletion of <i>fimS</i> in <i>pilY1</i> background                                                    | This work |
| PA14 <i>pilY1 fimS</i> + pMS402-P <i>fimU</i>                 | Deletion of <i>pilY1/fimS</i> with pMS402 containing <i>fimU</i> promoter                             | This work |
| PA14 <i>pilY1 algR</i>                                        | Deletion of <i>algR</i> in <i>pilY1</i> background                                                    | This work |
| PA14 <i>pilY1 algR</i> + pMS402-P <i>fimU</i>                 | Deletion of <i>pilY1/algR</i> with pMS402 containing <i>fimU</i> promoter                             | This work |
| PA14 <i>pilY1 algR</i> <sub>D54A</sub>                        | Deletion of <i>pilY1</i> in phospho-inactive <i>algR</i> background                                   | This work |
| PA14 <i>pilY1 algU</i>                                        | Deletion of <i>algU</i> in <i>pilY1</i> background                                                    | This work |

## References

1. Hoang TT, Karkhoff-Schweizer RR, Kutchma AJ, Schweizer HP. A broad-host-range Flp-FRT recombination system for site-specific excision of chromosomally-located DNA sequences: application for isolation of unmarked *Pseudomonas aeruginosa* mutants. *Gene*. 1998;212(1):77-86. doi: [https://doi.org/10.1016/S0378-1119\(98\)00130-9](https://doi.org/10.1016/S0378-1119(98)00130-9).
2. Asikyan ML, Kus JV, Burrows LL. Novel proteins that modulate type IV pilus retraction dynamics in *Pseudomonas aeruginosa*. *J Bacteriol*. 2008;190(21):7022-34. Epub 2008/09/09. doi: 10.1128/jb.00938-08. PubMed PMID: 18776014; PubMed Central PMCID: PMC2580705.

3. Giltner CL, Rana N, Lunardo MN, Hussain AQ, Burrows LL. Evolutionary and functional diversity of the *Pseudomonas* type IVa pilin island. *Environ Microbiol*. 2011;13(1):250-64. doi: 10.1111/j.1462-2920.2010.02327.x.
4. Mulcahy H, Charron-Mazenod L, Lewenza S. Extracellular DNA chelates cations and induces antibiotic resistance in *Pseudomonas aeruginosa* biofilms. *PLoS Pathog*. 2008;4(11):e1000213. doi: 10.1371/journal.ppat.1000213. PubMed PMID: PMC2581603.
5. Karimova G, Pidoux J, Ullmann A, Ladant D. A bacterial two-hybrid system based on a reconstituted signal transduction pathway. *Proc Natl Acad Sci U S A*. 1998;95(10):5752-6. Epub 1998/05/20. PubMed PMID: 9576956; PubMed Central PMCID: PMC20451.
6. Karimova G, Ullmann A, Ladant D. Protein-protein interaction between *Bacillus stearothermophilus* tyrosyl-tRNA synthetase subdomains revealed by a bacterial two-hybrid system. *J Mol Microbiol Biotechnol*. 2001;3(1):73-82. Epub 2001/02/24. PubMed PMID: 11200232.
7. Kilmury SLN, Burrows LL. Type IV pilins regulate their own expression via direct intramembrane interactions with the sensor kinase PilS. *Proc Natl Acad Sci U S A*. 2016;113(21):6017-22. doi: 10.1073/pnas.1512947113.
8. Nguyen Y, Sugiman-Marangos S, Harvey H, Bell SD, Charlton CL, Junop MS, et al. *Pseudomonas aeruginosa* minor pilins prime type IVa pilus assembly and promote surface display of the PilY1 adhesin. *J Biol Chem*. 2015;290(1):601-11. doi: 10.1074/jbc.M114.616904. PubMed PMID: PMC4281761.
9. Nguyen Y, Harvey H, Sugiman-Marangos S, Bell SD, Buensuceso RNC, Junop MS, et al. Structural and functional studies of the *Pseudomonas aeruginosa* minor pilin, PilE. *J Biol Chem*. 2015;290(44):26856-65. doi: 10.1074/jbc.M115.683334.
10. Brenner S. The genetics of *Caenorhabditis elegans*. *Genetics*. 1974;77(1):71-94. Epub 1974/05/01. PubMed PMID: 4366476; PubMed Central PMCID: PMC21213120.
11. Jacobs MA, Alwood A, Thaipisuttikul I, Spencer D, Haugen E, Ernst S, et al. Comprehensive transposon mutant library of *Pseudomonas aeruginosa*. *Proc Natl Acad Sci U S A*. 2003;100(24):14339-44. doi: 10.1073/pnas.2036282100.
12. Rahme LG, Stevens EJ, Wolfort SF, Shao J, Tompkins RG, Ausubel FM. Common virulence factors for bacterial pathogenicity in plants and animals. *Science*. 1995;268(5219):1899-902. Epub 1995/06/30. PubMed PMID: 7604262.
13. Merritt JH, Brothers KM, Kuchma SL, O'Toole GA. SadC reciprocally influences biofilm formation and swarming motility via modulation of exopolysaccharide production and flagellar function. *J Bacteriol*. 2007;189(22):8154-64. Epub 2007/06/26. doi: 10.1128/jb.00585-07. PubMed PMID: 17586642; PubMed Central PMCID: PMC2168701.

**Table S2. Primers used in this study.** Restriction sites are underlined.

| Primer name  | Sequence                             |
|--------------|--------------------------------------|
| pilA(-1100)F | TCGAGGATCCGCATCACGATCTTCTC           |
| pilA(52)R    | TACCTGCAGTCGCAACCACGATCATCAG         |
| pilA(62)F    | ACCTGCAGATATGCCTGCCCTGACTGCA         |
| pilA(+1056)R | CTGGAAGCTTCCGGCGGAATCAACG            |
| pilX CF      | GTCGAATTCATGACCCTGCGCCATACCTCTC      |
| pilX CR      | GACAAGCTTTCAGTTGGTATACAGGCGTGCA      |
| pilY1 CF     | GTCAGAATTCTGGAGCCAGCGCATGATC         |
| pilY1 CR     | CTATCCCGGGTCATTTCTCCTCGACGAC         |
| sadC(-500)F  | GATTGAATTCGAGCTCGAACACGGTGACGATCCCG  |
| sadC(+558)R  | CTAATCTAGAGGATCCCAGTCCGGCTCGTAGCGC   |
| algR F1      | GCAGAATTCGGCCGAGCATGCGGTG            |
| algR R1      | GCAGGATCCGAGGTTTCGTCATCGA            |
| algR F2      | GCAGGATCCGCCGGAGTCAGGCG              |
| algR R2      | GCAAAGCTTTCGCAGGCTGGAGGTG            |
| fimS(-500)F  | GACTGGTACC GTTCATGTGCACGTCTTCCAG     |
| fimS(+500)R  | GCCGAAGCTTTGTGGTCGGCAATGAAGAAG       |
| fimS(18)F    | GTACAACCATGGTAAGTTCCTTGAATCGGATAGGC  |
| fimS(15)R    | GAACTTACCATGGTTGTACATGCAGGAAGCCTGA   |
| algRD54-500F | CGGCTCTAGATGAGCAGTATCGTCTTGGCGATCG   |
| algRD54+500R | GATTAAGCTTGCACGAAGCGCTCGCCGAAC       |
| algR(D54A)F  | ATCGTCCTGCTGGCTATCCGCATGCC           |
| algR(D54A)R  | GGCATGCGGATAGCCAGCAGGACGAT           |
| algR(D54E)F  | ATCGTCCTGCTGGAAATCCGCATGCCC          |
| algR(D54E)R  | GGGCATGCGGATTTCCAGCAGGACGAT          |
| algU 74R     | GACTAGATCTAGACATGTCTGAGCAGATCGAAAGC  |
| algU 51F     | CAGACATGTCTAGATCTAGTCGCTCGTGAAGCAATC |
| algU -478F   | GTGAGCTCTCAAGGCCAGACTCAG             |
| algU +499R   | GAAAGCTTGGTATCGCTGGACGAGGAG          |

|              |                                             |
|--------------|---------------------------------------------|
| pilD 90R     | GACTACTCTAGACGATGGTTGAGGAAGCTGCC            |
| pilD 85F     | CATCGTCTAGAGTAGTCCTATCTGGCGATTGC            |
| pilD -638F   | CGGAGCTCCAGTTCCAGTCCGTATTTG                 |
| pilD +456R   | GTAAGCTTCCTGGAGGATCGAGCGC                   |
| algR CF      | GTAACCATGGCTCATGCAGGAAGCCTGAGCTTATG         |
| algR CR      | CAGTAAGCTTTCAGAGCTGATGCATCAGACGCCTG         |
| PfimU F      | GTTAGGATCCGCTCTCTTACCTGTGCTCCA              |
| PfimU R      | GCATGGATCCGCAGTACTCCACAAGGAAAAG             |
| PcdrA-500F   | GAGGATCCGATCGGCGCCTTGTTGCTG                 |
| PcdrA-1R     | GCGGATCCGAAAATCTCCCTATCTGCGTGCC             |
| FimS Bac-F   | CATTCTAGACATGCCTATCCGATTCAAG                |
| FimS Bac-R   | CCTGAATTCTCAGGCTTCTGCATGAGTCG               |
| AlgR BACTH F | GCAGGATCCCATGAATGTCCTGATTGTCCG              |
| AlgR BACTH R | GCAGGTACCGAGAGCTGATGCATCAGACG               |
| pilAB2HFor   | GCATCTAGACTTTACCTTGATCGAACTGATGATCGTGGTTG   |
| pilA2B2HRev  | CATGAATTCTTAGTTATCACAACCTTTTCGGAGTGAACATCGG |
| pilVB2HFor   | GCATCTAGACTTCAGCATGATCGAAGTGCTGGTCCG        |
| pilVB2HRev   | CATGGTACCTCATGGCTCGACCCTGAGG                |
| pilWB2HFor   | GCATCTAGACCTGTCCATGATCGAACTACTGGTGGCC       |
| pilWMCS2Rev  | AAGGTACCTCATGGCACGAGATTCTGAGTGTCTGG         |
| pilXB2HFor   | GTATCTAGACGCCACGCTGGTCATCGCC                |
| pilXMCS2Rev  | AAGGTACCTCAGTTGGTATAGAGACGGGCGAGAA          |



**A**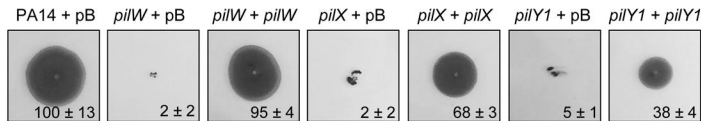**B**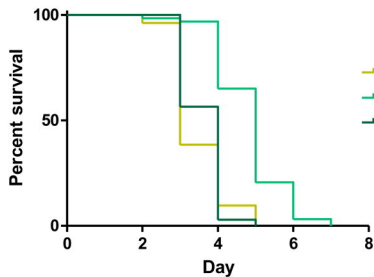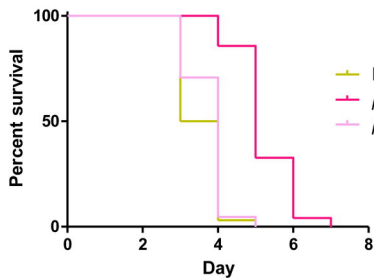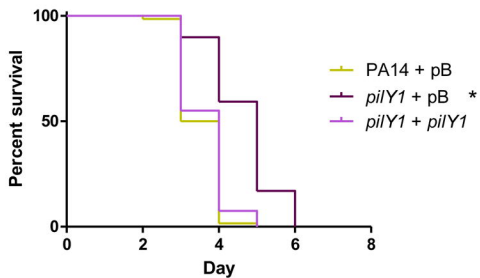

A

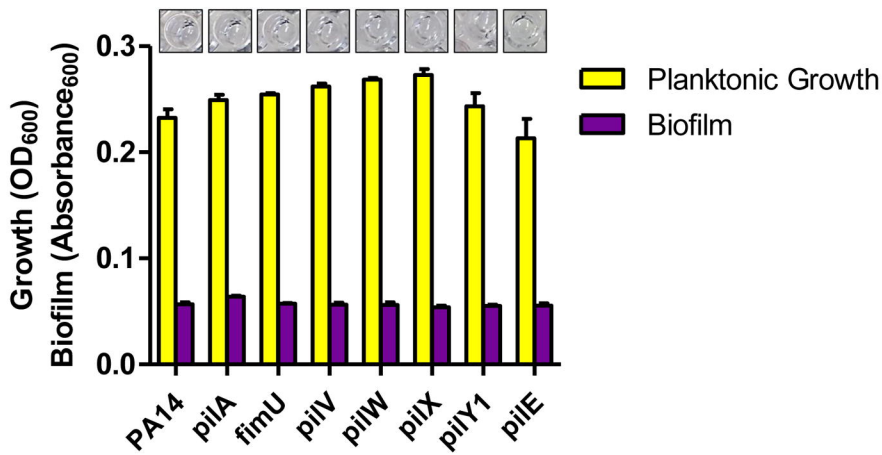

B

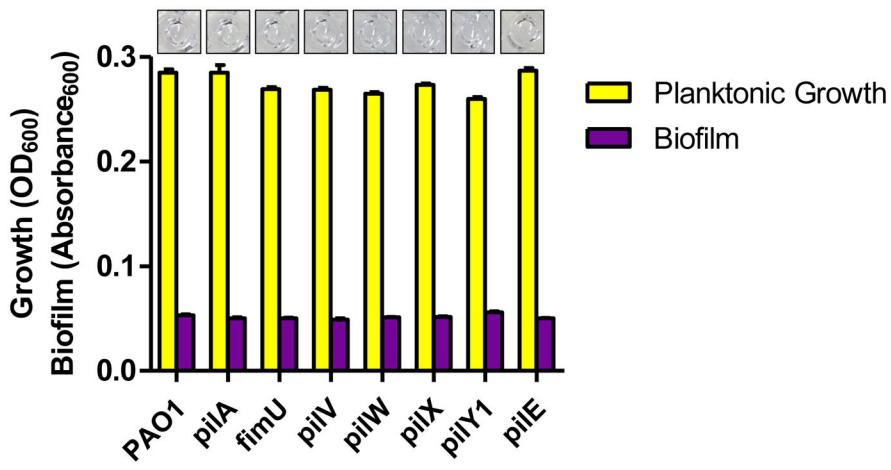

**A**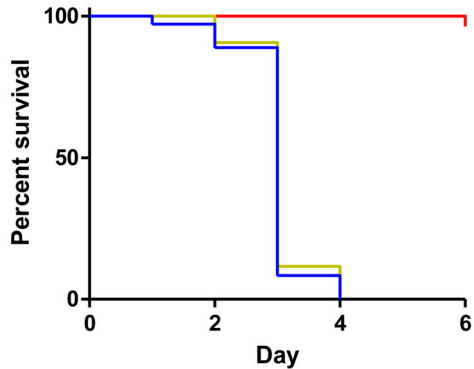

— OP50 \*  
— PA14  
— *sadC*

**B**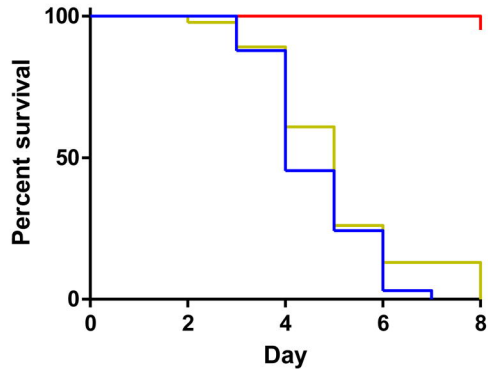

— OP50 \*  
— PAO1  
— *sadC*

**A**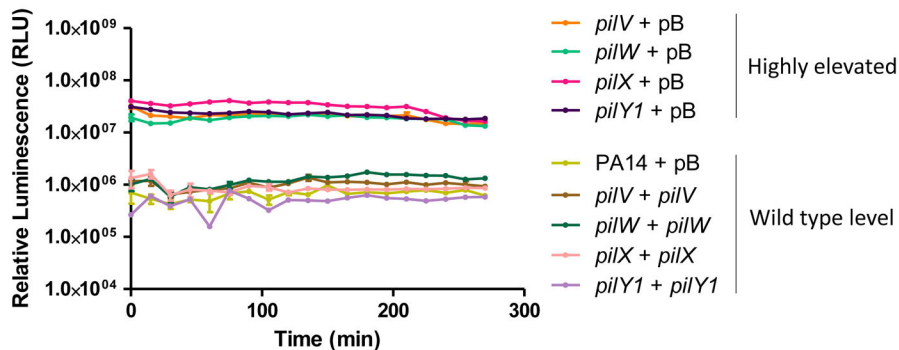**B**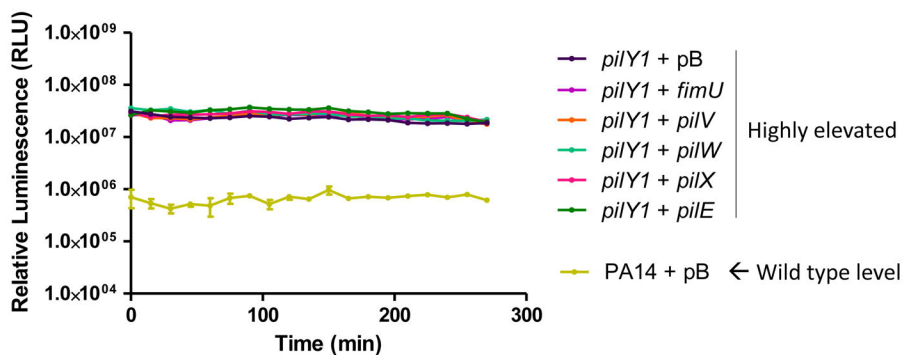**C**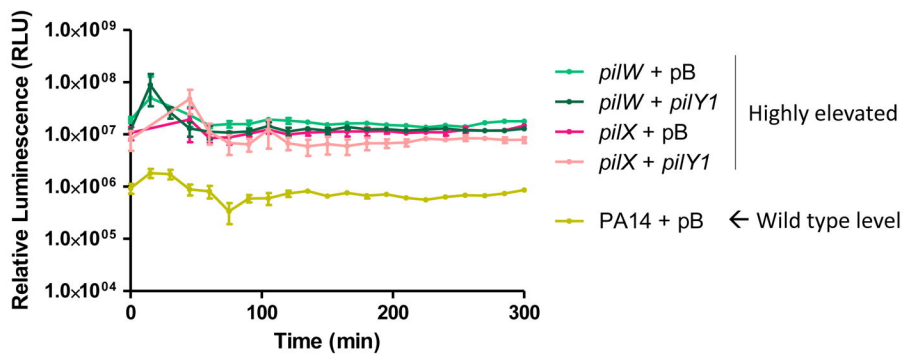

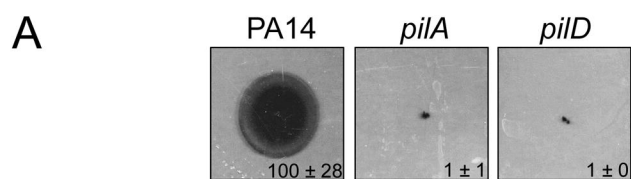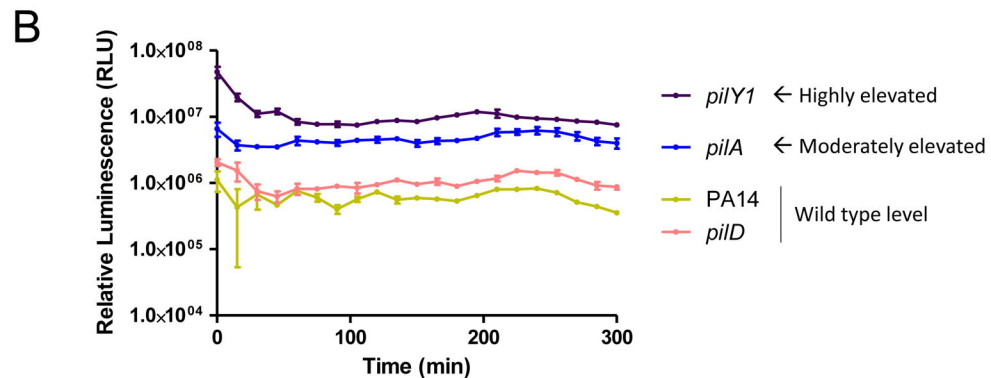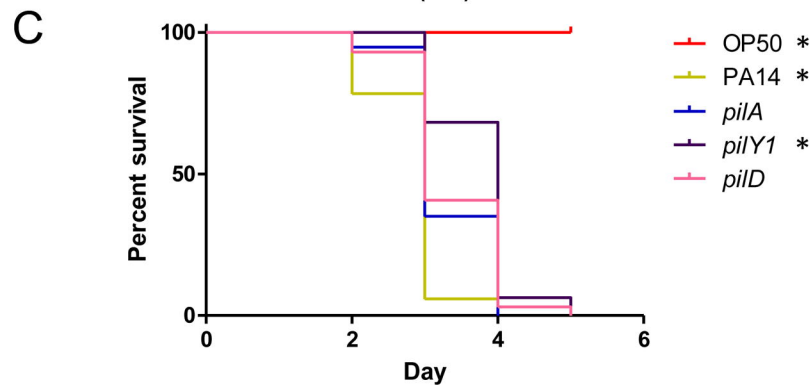

**A**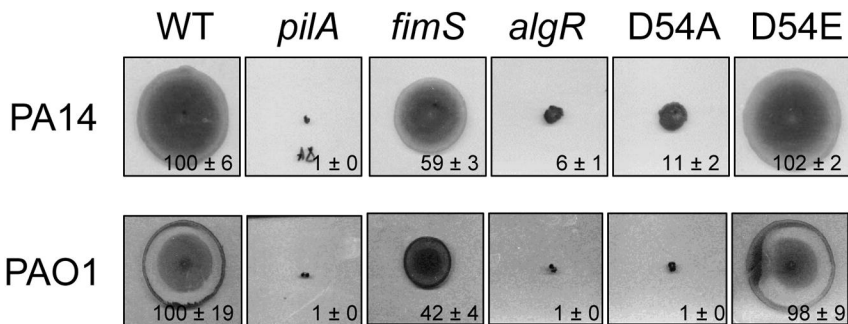**B**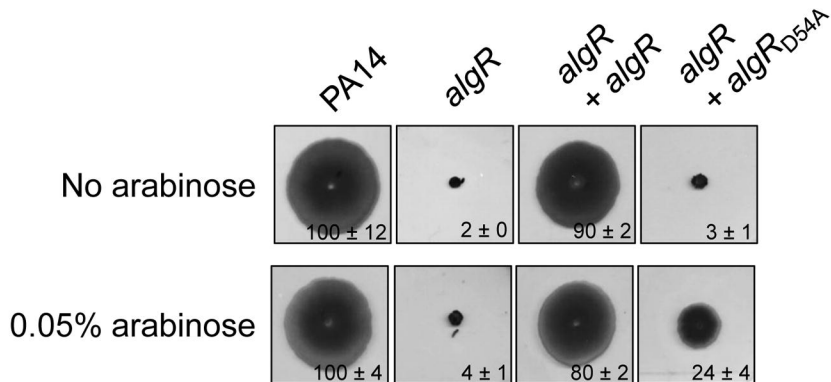

Source: http://biorxiv.org/content/10.1101/192062v2.full.pdf
